# Supplementary material
Source: PubMed Central journal article supplement (PMC9904409)
Supplement: ehp11171.s001.acco.pdf [file ehp11171.s001.acco.pdf]

**Note to readers with disabilities:** *EHP* strives to ensure that all journal content is accessible to all readers. However, some figures and Supplemental Material published in *EHP* articles may not conform to [508 standards](#) due to the complexity of the information being presented. If you need assistance accessing journal content, please contact [ehp508@niehs.nih.gov](mailto:ehp508@niehs.nih.gov). Our staff will work with you to assess and meet your accessibility needs within 3 working days.

### **Supplemental Material**

#### **Associations of Prenatal Chemical and Nonchemical Stressors with Early-Adulthood Anxiety and Depressive Symptoms**

Lisa B. Rokoff, Brent A. Coull, Michelle Bosquet Enlow, and Susan A. Korrick

#### **Table of Contents**

**Table S1.** List of psychotropic medications that New Bedford Cohort young adult participants reported taking on a regular basis on the early adult visit questionnaire.

**Table S2.** Concordance between the race/ethnicity, prenatal social disadvantage index (PNSDI) score, and quality of childhood home environment groups, among 209 New Bedford Cohort young adult participants included in at least one complete case analysis.

**Table S3.** Sociodemographic, exposure, and outcome characteristics of New Bedford Cohort participants who completed the Generalized Anxiety Disorder Scale (GAD-7) and/or Patient Health Questionnaire (PHQ-8) at the early adult visit, and that were included versus excluded in the complete case analytic cohort.

**Table S4.** Overall and strata-specific sample sizes and prevalence of moderately elevated anxiety symptoms [Generalized Anxiety Disorder scale (GAD-7)] and depressive symptoms [Patient Health Questionnaire (PHQ-8)] in complete case single-chemical models.

**Table S5.** Concordance between 1) elevated anxiety symptoms identified on the Generalized Anxiety Disorder scale (GAD-7) and elevated depressive symptoms identified on the Patient Health Questionnaire (PHQ-8); and 2) self-report physician diagnosed (in the past 10 years) anxiety or depression, among young adult New Bedford Cohort participants included in at least one complete case analysis.

**Table S6.** Adjusted overall and stratified risk ratios (95% confidence intervals) for moderately elevated anxiety and depressive symptoms, measured via the Generalized Anxiety Disorder scale (GAD-7) and Patient Health Questionnaire (PHQ-8), respectively, associated with a doubling of chemical in single-exposure models, among New Bedford Cohort participants.

**Table S7.** Unadjusted overall risk ratios (95% confidence intervals) for moderately elevated anxiety and depressive symptoms, measured via the Generalized Anxiety Disorder scale (GAD-7) and Patient Health Questionnaire (PHQ-8), respectively, associated with a doubling of chemical in single-exposure models, among New Bedford Cohort participants.

**Table S8.** Adjusted strata-specific (calculated by running models in stratified datasets) risk ratios (95% confidence intervals) for moderately elevated anxiety and depressive symptoms, measured via the Generalized Anxiety Disorder scale (GAD-7) and Patient Health Questionnaire (PHQ-8), respectively, associated with a doubling of chemical in single-exposure models, among New Bedford Cohort participants.

**Table S9.** Adjusted overall and stratified risk ratios (95% confidence intervals) for self-report physician diagnosed (in the past 10 years) anxiety or depression at the early adult assessment associated with a doubling of chemical in single-exposure models among New Bedford Cohort participants ( $n=161-167$ ).

**Table S10.** Inverse probability of censoring weighted (IPCW) adjusted overall and stratified risk ratios (95% confidence intervals) for moderately elevated anxiety and depressive symptoms, measured via the Generalized Anxiety Disorder scale (GAD-7) and Patient Health Questionnaire (PHQ-8), respectively, associated with a doubling of chemical in single-exposure models, among New Bedford Cohort participants.

**Table S11.** Adjusted overall and stratified risk ratios (95% confidence intervals) for moderately elevated anxiety and depressive symptoms, measured via the Generalized Anxiety Disorder scale (GAD-7) and Patient Health Questionnaire (PHQ-8), respectively, associated with a doubling of hexachlorobenzene (HCB) in single-exposure models among New Bedford Cohort participants, when excluding the minimum outlier HCB value.

**Table S12.** Adjusted overall and stratified risk ratios (95% confidence intervals) for moderately elevated anxiety and depressive symptoms, measured via the Generalized Anxiety Disorder scale (GAD-7) and Patient Health Questionnaire (PHQ-8), respectively, associated with a doubling of chemical in five-exposure models, among New Bedford Cohort participants.

**Table S13.** Adjusted overall and stratified risk ratios (95% confidence intervals) for moderately elevated anxiety and depressive symptoms, measured via the Generalized Anxiety Disorder scale (GAD-7) and Patient Health Questionnaire (PHQ-8), respectively, associated with a doubling of organochlorine exposure in single-exposure models additionally adjusted for prenatal consumption of seafood and local produce, among New Bedford Cohort participants.

**Table S14.** Adjusted overall and stratified risk ratios (95% confidence intervals) for moderately elevated anxiety and depressive symptoms, measured via the Generalized Anxiety Disorder scale (GAD-7) and Patient Health Questionnaire (PHQ-8), respectively, associated with a doubling of chemical in single-exposure models, among New Bedford Cohort participants who had data available on regular medication use at the early adult assessment ( $n=153-161$ ).

**Table S15.** Adjusted overall and stratified risk ratios (95% confidence intervals) for moderately elevated anxiety and depressive symptoms, measured via the Generalized Anxiety Disorder scale (GAD-7) and Patient Health Questionnaire (PHQ-8), respectively, associated with a doubling of chemical in single-exposure models, among New Bedford Cohort participants who had data available on medication use at the early adult assessment and did not report regularly using psychotropic medications ( $n=139-147$ ).

**Table S16.** Adjusted overall and stratified risk ratios (95% confidence intervals) for moderately elevated anxiety and depressive symptoms, measured via the Generalized Anxiety Disorder scale (GAD-7) and Patient Health Questionnaire (PHQ-8), respectively, associated with a doubling of prenatal and postnatal (i.e., peak early childhood) lead (Pb), among New Bedford Cohort participants.

**Figure S1.** Directed acyclic graph identifying confounders, predictors of internalizing symptoms, and effect modifiers for inclusion in regression models. Solid lines indicate *a priori* associations and dashed lines indicate hypothesized associations; underlined text indicates covariates that were considered both confounders and effect modifiers in models. Abbreviations: GAD-7, Generalized Anxiety Disorder scale; HCB, hexachlorobenzene; HOME: Home Observation for Measurement of the Environment; Mn, manganese; Pb, lead;  $\sum$ PCB<sub>4</sub>, sum of four polychlorinated biphenyl congeners (congeners: 118, 138, 153, 180); PHQ-8, Patient Health Questionnaire; PNSDI, prenatal social disadvantage index; p,p'-DDE, dichlorodiphenyldichloroethylene.

**Figure S2.** Covariate-adjusted associations between the log risk ratio of moderately elevated anxiety and depressive symptoms, measured via the Generalized Anxiety Disorder scale (GAD-7) and Patient Health Questionnaire (PHQ-8), respectively, and chemical biomarkers in single-chemical generalized additive models. Notes: In cases where splines indicated possible quadratic associations, goodness of fit was evaluated with the quasi-likelihood under the independence model information criterion (QICu) to compare modified Poisson regression models including a linear term versus both linear and quadratic terms for exposures; Models were adjusted for parental and household characteristics [prenatal social disadvantage index score (PNSDI), maternal smoking during pregnancy] and participant characteristics [age at assessment, race/ethnicity sex, Home Observation for Measurement of the Environment score]. Abbreviations: GAD-7: Generalized Anxiety Disorder scale; HCB: hexachlorobenzene; Mn: manganese; Pb: lead; PCB<sub>4</sub>: sum of four polychlorinated biphenyl congeners (congeners: 118, 138, 153, 180); PHQ-8: Patient Health Questionnaire; p,p'-DDE: dichlorodiphenyldichloroethylene.

**Figure S3.** Study flow chart for New Bedford Cohort participants included in the analytic cohort. Abbreviations: GAD-7, Generalized Anxiety Disorder Scale; PHQ-8, Patient Health Questionnaire.

**Figure S4.** Spearman correlations between cord serum biomarkers of organochlorine exposure [i.e., hexachlorobenzene (HCB), dichlorodiphenyldichloroethylene (DDE), sum of four polychlorinated biphenyl congeners (PCB<sub>4</sub>; congeners: 118, 138, 153, 180)], cord blood biomarkers of metal exposure [lead (PrenatalPb), manganese (Mn)], and peak early childhood blood lead (PostnatalPb) for 209 New Bedford Cohort participants included in at least one complete case analysis.

**Figure S5.** Quantile g-computation weights for each chemical in relation to elevated A) Generalized Anxiety Disorder scale (GAD-7) anxiety symptoms and B) Patient Health Questionnaire (PHQ-8) depressive symptoms, in the overall analytic cohort of New Bedford Cohort participants ( $n=187$  for GAD-7,  $n=188$  for PHQ-8). Abbreviations: DDE, dichlorodiphenyldichloroethylene; HCB, hexachlorobenzene; Mn, manganese; Pb, lead; PCB4, sum of four polychlorinated biphenyl congeners (congeners: 118, 138, 153, 180).

**Table S1.** List of psychotropic medications that New Bedford Cohort young adult participants reported taking on a regular basis on the early adult visit questionnaire

---

| <b>Medication names</b> <sup>a</sup> |
|--------------------------------------|
| Alpeazolam, Xanax                    |
| Buspirone                            |
| Citalopram                           |
| Duloxetine                           |
| Fluoxetine, Prozac                   |
| Fluvoxamine                          |
| Klonopin                             |
| Lamotrigine                          |
| Lithium                              |
| Lexapro                              |
| Lorazepam, Ativan                    |
| Nortriptyline                        |
| Paroxetine                           |
| Remeron                              |
| Risperidone                          |
| Sertraline, Zoloft                   |
| Trazodone                            |
| Trileptal                            |
| Venlafaxine                          |
| Wellbutrin                           |

---

<sup>a</sup> Medications were reported on a free-response question; in cases where participants used different brand names for the same drug, we have grouped those together in this table

**Table S2.** Concordance between the race/ethnicity, prenatal social disadvantage index (PNSDI) score, and quality of childhood home environment groups, among 209 New Bedford Cohort young adult participants included in at least one complete case analysis

| <b>Sociodemographic or non-chemical stressor group</b> | <b>N (%)<sup>a</sup></b>  | <b>N (%)<sup>a</sup></b>                     |
|--------------------------------------------------------|---------------------------|----------------------------------------------|
|                                                        | <b>Low PNSDI</b>          | <b>High PNSDI</b>                            |
| Non-Hispanic White                                     | 119 (84)                  | 39 (57)                                      |
| Underrepresented race/ethnicity <sup>b</sup>           | 22 (16)                   | 29 (43)                                      |
| High HOME score                                        | 101 (72)                  | 15 (22)                                      |
| Low HOME score                                         | 40 (28)                   | 53 (78)                                      |
| <b>Sociodemographic or non-chemical stressor group</b> | <b>N (%)<sup>a</sup></b>  | <b>N (%)<sup>a</sup></b>                     |
|                                                        | <b>High HOME score</b>    | <b>Low HOME score</b>                        |
| Non-Hispanic White                                     | 96 (83)                   | 62 (67)                                      |
| Underrepresented race/ethnicity <sup>b</sup>           | 20 (17)                   | 31 (33)                                      |
| Low PNSDI                                              | 101 (87)                  | 40 (43)                                      |
| High PNSDI                                             | 15 (13)                   | 53 (57)                                      |
| <b>Sociodemographic or non-chemical stressor group</b> | <b>N (%)<sup>a</sup></b>  | <b>N (%)<sup>a</sup></b>                     |
|                                                        | <b>Non-Hispanic White</b> | <b>Underrepresented race/ethnicity group</b> |
| High HOME score                                        | 96 (61)                   | 20 (39)                                      |
| Low HOME score                                         | 62 (39)                   | 31 (61)                                      |
| Low PNSDI score                                        | 119 (75)                  | 22 (43)                                      |
| High PNSDI score                                       | 39 (25)                   | 29 (57)                                      |

Abbreviation: HOME: Home Observation for Measurement of the Environment; PNSDI: prenatal social disadvantage index

<sup>a</sup> Percent for the column

<sup>b</sup> Of the 51 participants in the underrepresented racial/ethnic group, they were categorized as: 20 Cape Verdean, 18 Hispanic, 6 Black or African American, 4 Native American, 3 Asian American, and 2 Other race/ethnicity

**Table S3.** Sociodemographic, exposure, and outcome characteristics of New Bedford Cohort participants who completed the Generalized Anxiety Disorder Scale (GAD-7) and/or Patient Health Questionnaire (PHQ-8) at the early adult visit, and that were included versus excluded in the complete case analytic cohort

|                                                      | <b>Completed GAD-7 and/or PHQ-8 (n=240)</b> |     | <b>Included in any complete case analysis (n=209)</b> |     | <b>Excluded from any complete case analysis (n=579)</b> |     |
|------------------------------------------------------|---------------------------------------------|-----|-------------------------------------------------------|-----|---------------------------------------------------------|-----|
|                                                      | Mean $\pm$ SD or N (%)                      | N   | Mean $\pm$ SD or N (%)                                | N   | Mean $\pm$ SD or N (%)                                  | N   |
| <b>Parental and household characteristics</b>        |                                             |     |                                                       |     |                                                         |     |
| High PNSDI ( $\geq 3$ on 0-5 scale)                  | 81 <sup>a</sup> (34)                        | 235 | 68 <sup>a</sup> (33)                                  | 209 | 237 (47)                                                | 503 |
| Maternal age at child's birth <20 years <sup>a</sup> | 28 (12)                                     | 240 | 24 (11)                                               | 209 | 82 (14)                                                 | 579 |
| Maternal high school graduate or less <sup>a</sup>   | 119 (51)                                    | 235 | 101 (49)                                              | 208 | 320 (61)                                                | 523 |
| Paternal high school graduate or less <sup>a</sup>   | 150 (64)                                    | 234 | 131 (63)                                              | 207 | 381 (74)                                                | 513 |
| Annual household income <\$20,000 <sup>a</sup>       | 74 (31)                                     | 237 | 64 (31)                                               | 209 | 201 (39)                                                | 515 |
| Not married at birth <sup>a</sup>                    | 84 (35)                                     | 237 | 68 (33)                                               | 209 | 263 (50)                                                | 524 |
| Maternal prenatal smoking                            | 60 (26)                                     | 227 | 53 (25)                                               | 209 | 151 (32)                                                | 477 |
| Low HOME score [<median (45) on 0-60 scale]          | 100 <sup>b</sup> (46)                       | 218 | 93 <sup>b</sup> (45)                                  | 209 | 172 (58)                                                | 298 |
| Obstetrical risk score                               | 14.8 $\pm$ 10.2                             | 240 | 14.6 $\pm$ 10.1                                       | 209 | 15.8 $\pm$ 10.8                                         | 579 |
| <b>Participant characteristics</b>                   |                                             |     |                                                       |     |                                                         |     |
| Age at GAD-7 and PHQ-8 assessment                    | 22.1 $\pm$ 1.6                              | 240 | 22.1 $\pm$ 1.5                                        | 209 |                                                         |     |
| Female                                               | 160 (67)                                    | 240 | 139 (67)                                              | 209 | 241 (42)                                                | 579 |
| Underrepresented racial/ethnic group                 | 62 (26)                                     | 240 | 51 (24)                                               | 209 | 204 (35)                                                | 577 |
| Birth weight (grams)                                 | 3396 $\pm$ 414                              | 240 | 3417 $\pm$ 415                                        | 209 | 3383 $\pm$ 468                                          | 578 |
| Gestational age at birth (weeks)                     | 39.6 $\pm$ 1.1                              | 239 | 39.6 $\pm$ 1.1                                        | 208 | 39.6 $\pm$ 1.2                                          | 579 |
| <b>Chemical biomarker levels</b>                     |                                             |     |                                                       |     |                                                         |     |
| Cord serum HCB (ng/g)                                | 0.03 $\pm$ 0.02                             | 234 | 0.03 $\pm$ 0.02                                       | 204 | 0.03 $\pm$ 0.04                                         | 547 |
| Cord serum p,p'-DDE (ng/g)                           | 0.46 $\pm$ 0.73                             | 234 | 0.48 $\pm$ 0.77                                       | 204 | 0.48 $\pm$ 0.99                                         | 547 |
| Cord serum $\Sigma$ PCB <sub>4</sub> (ng/g)          | 0.27 $\pm$ 0.38                             | 234 | 0.28 $\pm$ 0.40                                       | 204 | 0.24 $\pm$ 0.24                                         | 547 |
| Cord blood Pb ( $\mu$ g/dL)                          | 1.54 $\pm$ 1.58                             | 228 | 1.43 $\pm$ 1.12                                       | 198 | 1.57 $\pm$ 1.46                                         | 550 |
| Peak early childhood Pb ( $\mu$ g/dL) <sup>c</sup>   | 6.60 $\pm$ 3.76                             | 206 | 6.56 $\pm$ 3.79                                       | 193 | 6.92 $\pm$ 4.01                                         | 383 |
| Cord blood Mn ( $\mu$ g/dL)                          | 4.36 $\pm$ 1.82                             | 220 | 4.30 $\pm$ 1.67                                       | 193 | 4.24 $\pm$ 1.86                                         | 516 |

| <b>Early adulthood internalizing outcomes</b> |           |     |           |     |           |    |
|-----------------------------------------------|-----------|-----|-----------|-----|-----------|----|
| GAD-7 score (0-21)                            | 5.8 ± 4.1 | 239 | 5.6 ± 4.1 | 208 | 7.1 ± 3.9 | 31 |
| PHQ-8 score (0-24)                            | 6.4 ± 5.7 | 239 | 6.4 ± 5.7 | 209 | 6.6 ± 5.6 | 30 |
| Moderately elevated GAD-7 symptoms (≥10)      | 50 (21)   | 239 | 40 (19)   | 208 | 10 (32)   | 31 |
| Moderately elevated PHQ-8 symptoms (≥10)      | 58 (24)   | 239 | 51 (24)   | 209 | 7 (23)    | 30 |
| Psychotropic medication use                   | 20 (11)   | 188 | 15 (9)    | 164 | 6 (11)    | 57 |
| Diagnosis of an anxiety disorder              | 56 (28)   | 199 | 42 (25)   | 172 | 18 (27)   | 66 |
| Diagnosis of depression                       | 44 (22)   | 199 | 36 (21)   | 172 | 13 (20)   | 66 |

Abbreviations: GAD-7: Generalized Anxiety Disorder scale; HCB: hexachlorobenzene; HOME: Home Observation for Measurement of the Environment; Mn: manganese; Pb: lead;  $\Sigma$ PCB<sub>4</sub>: sum of four polychlorinated biphenyl congeners; PHQ-8: Patient Health Questionnaire; p,p'-DDE: dichlorodiphenyldichloroethylene; PNSDI: prenatal social disadvantage index; SD: standard deviation

<sup>a</sup> These parental and household characteristics contribute towards the total score for the prenatal social disadvantage index (PNSDI); for 3 participants (in complete case analysis) who were missing one of the parental and household characteristics, the PNSDI score was weighted (i.e., multiplied by 5/4)

<sup>b</sup> For 16 participants (in the complete case analysis) who were missing the HOME score at the 15-year assessment, the HOME score from the 8-year assessment was used

<sup>c</sup> Peak early childhood blood lead levels from ages 12 to 36 months



**Table S4.** Overall and strata-specific sample sizes and prevalence of moderately elevated anxiety symptoms [Generalized Anxiety Disorder scale (GAD-7)] and depressive symptoms [Patient Health Questionnaire (PHQ-8)] in complete case single-chemical models

| Internalizing symptoms<br>GAD-7 (Anxiety) | Organochlorines<br>(HCB, p,p'-DDE, $\Sigma$ PCB <sub>4</sub> ) |                          | Pb       |                          | Mn       |                          |
|-------------------------------------------|----------------------------------------------------------------|--------------------------|----------|--------------------------|----------|--------------------------|
|                                           | N (%)                                                          | N (%) <sup>a</sup> Cases | N (%)    | N (%) <sup>a</sup> Cases | N (%)    | N (%) <sup>a</sup> Cases |
| Total                                     | 203                                                            | 39 (19)                  | 197      | 37 (19)                  | 192      | 36 (19)                  |
| Sex-stratified                            |                                                                |                          |          |                          |          |                          |
| Female                                    | 134 (66)                                                       | 29 (22)                  | 132 (67) | 28 (21)                  | 129 (67) | 28 (22)                  |
| Male                                      | 69 (34)                                                        | 10 (14)                  | 65 (33)  | 9 (14)                   | 63 (33)  | 8 (13)                   |
| Race/ethnicity-stratified                 |                                                                |                          |          |                          |          |                          |
| Underrepresented group                    | 50 (25)                                                        | 15 (30)                  | 48 (24)  | 15 (31)                  | 47 (24)  | 14 (30)                  |
| Non-Hispanic White                        | 153 (75)                                                       | 24 (16)                  | 149 (76) | 22 (15)                  | 145 (76) | 22 (15)                  |
| PNSDI-stratified                          |                                                                |                          |          |                          |          |                          |
| High ( $\geq 3$ )                         | 65 (32)                                                        | 20 (31)                  | 66 (34)  | 21 (32)                  | 66 (34)  | 21 (32)                  |
| Low (<3)                                  | 138 (68)                                                       | 19 (14)                  | 131 (67) | 16 (12)                  | 126 (66) | 15 (12)                  |
| HOME-stratified                           |                                                                |                          |          |                          |          |                          |
| Low (<45)                                 | 91 (45)                                                        | 23 (25)                  | 88 (45)  | 24 (27)                  | 86 (45)  | 23 (27)                  |
| High ( $\geq 45$ )                        | 112 (55)                                                       | 16 (14)                  | 109 (55) | 13 (12)                  | 106 (55) | 13 (12)                  |
| PHQ-8 (Depressive)                        | Organochlorines<br>(HCB, p,p'-DDE, $\Sigma$ PCB <sub>4</sub> ) |                          | Pb       |                          | Mn       |                          |
|                                           | N (%)                                                          | N (%) <sup>a</sup> Cases | N (%)    | N (%) <sup>a</sup> Cases | N (%)    | N (%) <sup>a</sup> Cases |
| Total                                     | 204                                                            | 49 (24)                  | 198      | 48 (24)                  | 193      | 47 (24)                  |
| Sex-stratified                            |                                                                |                          |          |                          |          |                          |
| Female                                    | 135 (66)                                                       | 36 (27)                  | 133 (67) | 36 (27)                  | 130 (67) | 36 (28)                  |
| Male                                      | 69 (34)                                                        | 13 (19)                  | 65 (33)  | 12 (18)                  | 63 (33)  | 11 (17)                  |
| Race/ethnicity-stratified                 |                                                                |                          |          |                          |          |                          |
| Underrepresented group                    | 51 (25)                                                        | 17 (33)                  | 49 (25)  | 16 (33)                  | 48 (25)  | 15 (31)                  |
| Non-Hispanic White                        | 153 (75)                                                       | 32 (21)                  | 149 (75) | 32 (21)                  | 145 (75) | 32 (22)                  |
| PNSDI-stratified                          |                                                                |                          |          |                          |          |                          |
| High ( $\geq 3$ )                         | 66 (32)                                                        | 25 (38)                  | 67 (34)  | 26 (39)                  | 67 (35)  | 26 (39)                  |
| Low (<3)                                  | 138 (68)                                                       | 24 (17)                  | 131 (66) | 22 (17)                  | 126 (65) | 21 (17)                  |
| HOME-stratified                           |                                                                |                          |          |                          |          |                          |
| Low (<45)                                 | 92 (45)                                                        | 32 (35)                  | 89 (45)  | 31 (35)                  | 87 (45)  | 30 (34)                  |
| High ( $\geq 45$ )                        | 112 (55)                                                       | 17 (15)                  | 109 (55) | 17 (16)                  | 106 (55) | 17 (16)                  |

Abbreviations: GAD-7: Generalized Anxiety Disorder scale; HCB: hexachlorobenzene; HOME: Home Observation for Measurement of the Environment; Mn: manganese; Pb: lead;  $\Sigma$ PCB<sub>4</sub>: sum of four polychlorinated biphenyl congeners; PHQ-8: Patient Health Questionnaire; p,p'-DDE: dichlorodiphenyldichloroethylene; PNSDI: prenatal social disadvantage index

<sup>a</sup> Percent of elevated symptom cases in specific strata (by row)

**Table S5.** Concordance between 1) elevated anxiety symptoms identified on the Generalized Anxiety Disorder scale (GAD-7) and elevated depressive symptoms identified on the Patient Health Questionnaire (PHQ-8); and 2) self-report physician diagnosed (in the past 10 years) anxiety or depression, among young adult New Bedford Cohort participants included in at least one complete case analysis <sup>a, b, c</sup>

|                                                    | <b>N (%)<sup>d</sup></b>  | <b>N (%)<sup>d</sup></b> |                     |
|----------------------------------------------------|---------------------------|--------------------------|---------------------|
|                                                    | <b>GAD-7 score &lt;10</b> | <b>GAD-7 score ≥10</b>   | <b>Total</b>        |
| <b>PHQ-8 score &lt;10</b>                          | 150 (89)                  | 7 (18)                   | 157 (75)            |
| <b>PHQ-8 score ≥10</b>                             | 18 (11)                   | 33 (83)                  | 51 (25)             |
| <b>Total</b>                                       | 168                       | 40                       | 208 <sup>a</sup>    |
|                                                    | <b>N (%)<sup>d</sup></b>  | <b>N (%)<sup>d</sup></b> |                     |
|                                                    | <b>GAD-7 score &lt;10</b> | <b>GAD-7 score ≥10</b>   | <b>Total</b>        |
| <b>No self-reported diagnosed anxiety disorder</b> | 115 (83)                  | 13 (39)                  | 128 (75)            |
| <b>Self-reported diagnosed anxiety disorder</b>    | 23 (17)                   | 20 (61)                  | 43 (25)             |
| <b>Total</b>                                       | 138                       | 33                       | 171 <sup>b, c</sup> |
|                                                    | <b>N (%)<sup>d</sup></b>  | <b>N (%)<sup>d</sup></b> |                     |
|                                                    | <b>PHQ-8 score &lt;10</b> | <b>PHQ-8 score ≥10</b>   | <b>Total</b>        |
| <b>No self-reported diagnosed depression</b>       | 115 (88)                  | 21 (50)                  | 136 (79)            |
| <b>Self-reported diagnosed depression</b>          | 15 (12)                   | 21 (50)                  | 36 (21)             |
| <b>Total</b>                                       | 130                       | 42                       | 172 <sup>b</sup>    |

Abbreviations: GAD-7: Generalized Anxiety Disorder scale; PHQ-8: Patient Health Questionnaire

<sup>a</sup> Of the 209 participants included in the analytic cohort, 208 had both a GAD-7 and PHQ-8 score

<sup>b</sup> When comparing GAD-7 and PHQ-8 scores with self-reported medical diagnosis on the early adult assessment, 172 participants had data available on medical diagnosis information

<sup>c</sup> Of the 172 participants who have self-reported medical diagnosis information, only 171 individuals had corresponding data for the GAD-7

<sup>d</sup> Percent for the column

**Table S6.** Adjusted <sup>a</sup> overall and stratified <sup>b</sup> risk ratios (95% confidence intervals) for moderately elevated anxiety and depressive symptoms, measured via the Generalized Anxiety Disorder scale (GAD-7) and Patient Health Questionnaire (PHQ-8), respectively, associated with a doubling of chemical in single-exposure models, among New Bedford Cohort participants

| <b>Internalizing symptoms</b> | <b>Risk ratio (95% confidence interval) per doubling chemical level</b> |                         |                                 |                                 |                   |
|-------------------------------|-------------------------------------------------------------------------|-------------------------|---------------------------------|---------------------------------|-------------------|
|                               | <b>GAD-7 (Anxiety)</b>                                                  | <b>HCB (n=203)</b>      | <b>p,p'-DDE (n=203)</b>         | <b>∑PCB<sub>4</sub> (n=203)</b> | <b>Pb (n=197)</b> |
| Total                         | 1.31 (0.89, 1.92)                                                       | 1.19 (0.89, 1.59)       | 0.97 (0.76, 1.24)               | 1.41 (1.03, 1.94)               | 0.99 (0.58, 1.71) |
| Sex-stratified                |                                                                         |                         |                                 |                                 |                   |
| Female                        | 1.31 (0.89, 1.94)                                                       | 1.20 (0.84, 1.71)       | 1.01 (0.76, 1.34)               | 1.24 (0.86, 1.78)               | 1.11 (0.59, 2.07) |
| Male                          | 1.30 (0.53, 3.18)                                                       | 1.17 (0.76, 1.80)       | 0.83 (0.53, 1.31)               | 2.22 (1.18, 4.16)               | 0.71 (0.25, 2.04) |
| p <sub>interaction</sub>      | 0.99                                                                    | 0.94                    | 0.49                            | 0.09                            | 0.49              |
| Race/ethnicity-stratified     |                                                                         |                         |                                 |                                 |                   |
| Underrepresented group        | 1.86 (1.18, 2.95)                                                       | 1.39 (0.97, 1.97)       | 1.03 (0.69, 1.53)               | 1.47 (0.86, 2.50)               | 0.96 (0.48, 1.90) |
| Non-Hispanic White            | 1.07 (0.66, 1.72)                                                       | 1.04 (0.63, 1.73)       | 0.93 (0.68, 1.27)               | 1.37 (0.97, 1.96)               | 1.03 (0.45, 2.37) |
| p <sub>interaction</sub>      | 0.10                                                                    | 0.36                    | 0.69                            | 0.83                            | 0.89              |
| PNSDI-stratified              |                                                                         |                         |                                 |                                 |                   |
| High (≥3)                     | 1.22 (0.69, 2.16)                                                       | 0.93 (0.59, 1.47)       | 0.62 (0.43, 0.91)               | 1.24 (0.84, 1.83)               | 1.16 (0.61, 2.22) |
| Low (<3)                      | 1.42 (0.88, 2.31)                                                       | 1.35 (0.98, 1.86)       | 1.33 (0.92, 1.91)               | 1.88 (1.14, 3.10)               | 0.66 (0.23, 1.84) |
| p <sub>interaction</sub>      | 0.69                                                                    | 0.19                    | 0.004                           | 0.18                            | 0.37              |
| HOME-stratified               |                                                                         |                         |                                 |                                 |                   |
| Low (<45)                     | 1.32 (0.75, 2.33)                                                       | 0.77 (0.51, 1.16)       | 0.78 (0.58, 1.05)               | 1.30 (0.89, 1.90)               | 1.00 (0.54, 1.84) |
| High (≥45)                    | 1.28 (0.81, 2.03)                                                       | 1.54 (1.20, 1.99)       | 1.23 (0.80, 1.90)               | 1.78 (1.07, 2.94)               | 0.99 (0.31, 3.19) |
| p <sub>interaction</sub>      | 0.94                                                                    | 0.01                    | 0.09                            | 0.31                            | 0.99              |
| <b>PHQ-8 (Depressive)</b>     | <b>HCB (n=204)</b>                                                      | <b>p,p'-DDE (n=204)</b> | <b>∑PCB<sub>4</sub> (n=204)</b> | <b>Pb (n=198)</b>               | <b>Mn (n=193)</b> |
| Total                         | 1.10 (0.84, 1.45)                                                       | 1.08 (0.83, 1.39)       | 0.93 (0.76, 1.14)               | 1.18 (0.91, 1.53)               | 0.82 (0.52, 1.32) |
| Sex-stratified                |                                                                         |                         |                                 |                                 |                   |
| Female                        | 1.21 (0.88, 1.65)                                                       | 1.03 (0.73, 1.46)       | 0.95 (0.75, 1.20)               | 1.17 (0.88, 1.56)               | 0.95 (0.55, 1.64) |
| Male                          | 0.94 (0.64, 1.38)                                                       | 1.19 (0.84, 1.69)       | 0.88 (0.59, 1.30)               | 1.21 (0.68, 2.14)               | 0.53 (0.21, 1.34) |
| p <sub>interaction</sub>      | 0.31                                                                    | 0.58                    | 0.75                            | 0.92                            | 0.29              |
| Race/ethnicity-stratified     |                                                                         |                         |                                 |                                 |                   |
| Underrepresented group        | 1.26 (0.81, 1.97)                                                       | 1.12 (0.80, 1.57)       | 0.96 (0.66, 1.38)               | 1.14 (0.71, 1.85)               | 0.70 (0.36, 1.36) |
| Non-Hispanic White            | 1.04 (0.75, 1.43)                                                       | 1.06 (0.73, 1.52)       | 0.91 (0.71, 1.17)               | 1.20 (0.90, 1.59)               | 0.93 (0.48, 1.80) |
| p <sub>interaction</sub>      | 0.49                                                                    | 0.85                    | 0.85                            | 0.87                            | 0.56              |
| PNSDI-stratified              |                                                                         |                         |                                 |                                 |                   |
| High (≥3)                     | 0.97 (0.70, 1.35)                                                       | 0.76 (0.53, 1.10)       | 0.64 (0.46, 0.90)               | 0.85 (0.58, 1.25)               | 0.78 (0.46, 1.33) |
| Low (<3)                      | 1.29 (0.89, 1.88)                                                       | 1.30 (0.99, 1.70)       | 1.20 (0.90, 1.61)               | 1.99 (1.34, 2.98)               | 0.93 (0.36, 2.43) |
| p <sub>interaction</sub>      | 0.26                                                                    | 0.02                    | 0.01                            | 0.002                           | 0.75              |
| HOME-stratified               |                                                                         |                         |                                 |                                 |                   |
| Low (<45)                     | 1.03 (0.73, 1.45)                                                       | 0.92 (0.66, 1.29)       | 0.85 (0.67, 1.09)               | 0.96 (0.68, 1.37)               | 0.79 (0.48, 1.29) |
| High (≥45)                    | 1.27 (0.84, 1.89)                                                       | 1.25 (0.92, 1.70)       | 1.04 (0.71, 1.53)               | 1.85 (1.22, 2.81)               | 0.93 (0.32, 2.67) |
| p <sub>interaction</sub>      | 0.44                                                                    | 0.20                    | 0.40                            | 0.02                            | 0.79              |

Abbreviations: GAD-7: Generalized Anxiety Disorder scale; HCB: hexachlorobenzene; HOME: Home Observation for Measurement of the Environment; Mn: manganese; Pb: lead;  $\Sigma$ PCB<sub>4</sub>: sum of four polychlorinated biphenyl congeners; PHQ-8: Patient Health Questionnaire;  $p_{\text{interaction}}$ : p-value for interaction term between prenatal chemical biomarker and sociodemographic/non-chemical stressor; p,p'-DDE: dichlorodipenyldichloroethylene; PNSDI: prenatal social disadvantage index

<sup>a</sup> Adjusted for parental and household characteristics (prenatal social disadvantage index, maternal smoking during pregnancy, Home Observation for Measurement of the Environment score) and participant characteristics (sex, race/ethnicity, age at assessment)

<sup>b</sup> For each outcome and chemical, risk ratios were estimated from five models: one with no interaction term and four including a product interaction term between the chemical and each of the four specified other stressors

**Table S7.** Unadjusted overall risk ratios (95% confidence intervals) for moderately elevated anxiety and depressive symptoms, measured via the Generalized Anxiety Disorder scale (GAD-7) and Patient Health Questionnaire (PHQ-8), respectively, associated with a doubling of chemical in single-exposure models, among New Bedford Cohort participants

| Internalizing symptoms | Risk ratio (95% confidence interval) per doubling chemical level |                           |                                    |                     |                     |
|------------------------|------------------------------------------------------------------|---------------------------|------------------------------------|---------------------|---------------------|
|                        | HCB ( <i>n</i> =203)                                             | p,p'-DDE ( <i>n</i> =203) | ∑PCB <sub>4</sub> ( <i>n</i> =203) | Pb ( <i>n</i> =197) | Mn ( <i>n</i> =192) |
| GAD-7 (Anxiety)        | 1.17 (0.80, 1.71)                                                | 1.13 (0.85, 1.50)         | 0.94 (0.73, 1.22)                  | 1.51 (1.14, 2.01)   | 1.30 (0.72, 2.33)   |
| PHQ-8 (Depressive)     | 1.01 (0.76, 1.34)                                                | 1.01 (0.79, 1.30)         | 0.91 (0.74, 1.12)                  | 1.30 (1.01, 1.68)   | 1.05 (0.63, 1.73)   |

Abbreviations: GAD-7: Generalized Anxiety Disorder scale; HCB: hexachlorobenzene; Mn: manganese; Pb: lead; ∑PCB<sub>4</sub>: sum of four polychlorinated biphenyl congeners; PHQ-8: Patient Health Questionnaire; p,p'-DDE: dichlorodipenyldichloroethylene

**Table S8.** Adjusted <sup>a</sup> strata-specific (calculated by running models in stratified datasets) <sup>b</sup> risk ratios (95% confidence intervals) for moderately elevated anxiety and depressive symptoms, measured via the Generalized Anxiety Disorder scale (GAD-7) and Patient Health Questionnaire (PHQ-8), respectively, associated with a doubling of chemical in single-exposure models, among New Bedford Cohort participants

| Internalizing symptoms    | Risk ratio (95% confidence interval) per doubling chemical level |                   |                   |                   |                   |
|---------------------------|------------------------------------------------------------------|-------------------|-------------------|-------------------|-------------------|
|                           | HCB                                                              | p,p'-DDE          | ∑PCB <sub>4</sub> | Pb                | Mn                |
| <b>GAD-7 (Anxiety)</b>    |                                                                  |                   |                   |                   |                   |
| Sex-stratified            |                                                                  |                   |                   |                   |                   |
| Female                    | 1.21 (0.84, 1.75)                                                | 1.20 (0.83, 1.76) | 0.98 (0.75, 1.29) | 1.33 (0.96, 1.85) | 1.21 (0.65, 2.25) |
| Male                      | 1.30 (0.59, 2.85)                                                | 1.17 (0.76, 1.81) | 0.85 (0.58, 1.25) | 2.38 (1.32, 4.29) | 0.75 (0.32, 1.75) |
| Race/ethnicity-stratified |                                                                  |                   |                   |                   |                   |
| Underrepresented group    | 1.56 (1.06, 2.31)                                                | 1.22 (0.87, 1.71) | 1.02 (0.68, 1.53) | 1.39 (0.85, 2.29) | 1.00 (0.47, 2.10) |
| Non-Hispanic White        | 1.04 (0.64, 1.69)                                                | 1.07 (0.62, 1.85) | 0.94 (0.67, 1.30) | 1.37 (1.01, 1.85) | 0.94 (0.41, 2.19) |
| PNSDI-stratified          |                                                                  |                   |                   |                   |                   |
| High (≥3)                 | 1.19 (0.74, 1.92)                                                | 0.93 (0.60, 1.45) | 0.63 (0.43, 0.91) | 1.27 (0.86, 1.87) | 1.20 (0.61, 2.33) |
| Low (<3)                  | 1.40 (0.86, 2.28)                                                | 1.34 (0.95, 1.91) | 1.31 (0.92, 1.87) | 2.14 (1.21, 3.77) | 0.68 (0.21, 2.22) |
| HOME-stratified           |                                                                  |                   |                   |                   |                   |
| Low (<45)                 | 1.26 (0.74, 2.17)                                                | 0.76 (0.51, 1.15) | 0.79 (0.58, 1.07) | 1.31 (0.91, 1.87) | 1.04 (0.55, 1.97) |
| High (≥45)                | 1.31 (0.83, 2.09)                                                | 1.50 (1.11, 2.02) | 1.27 (0.86, 1.86) | 1.94 (1.10, 3.45) | 0.77 (0.23, 2.56) |
| <b>PHQ-8 (Depressive)</b> |                                                                  |                   |                   |                   |                   |
| Sex-stratified            |                                                                  |                   |                   |                   |                   |
| Female                    | 1.18 (0.87, 1.61)                                                | 1.03 (0.72, 1.48) | 0.94 (0.75, 1.17) | 1.27 (0.97, 1.65) | 1.00 (0.59, 1.70) |
| Male                      | 0.91 (0.63, 1.32)                                                | 1.26 (0.87, 1.81) | 0.79 (0.54, 1.15) | 1.17 (0.71, 1.91) | 0.62 (0.24, 1.61) |
| Race/ethnicity-stratified |                                                                  |                   |                   |                   |                   |
| Underrepresented group    | 1.01 (0.61, 1.65)                                                | 0.95 (0.70, 1.31) | 0.87 (0.61, 1.24) | 1.02 (0.67, 1.56) | 0.65 (0.32, 1.31) |
| Non-Hispanic White        | 1.05 (0.75, 1.47)                                                | 1.09 (0.74, 1.61) | 0.94 (0.72, 1.22) | 1.22 (0.94, 1.58) | 0.86 (0.44, 1.67) |
| PNSDI-stratified          |                                                                  |                   |                   |                   |                   |
| High (≥3)                 | 0.94 (0.69, 1.29)                                                | 0.74 (0.50, 1.10) | 0.66 (0.45, 0.95) | 0.85 (0.59, 1.23) | 0.75 (0.45, 1.26) |
| Low (<3)                  | 1.31 (0.88, 1.94)                                                | 1.23 (0.94, 1.62) | 1.24 (0.92, 1.66) | 2.14 (1.38, 3.32) | 0.89 (0.32, 2.48) |
| HOME-stratified           |                                                                  |                   |                   |                   |                   |
| Low (<45)                 | 1.03 (0.74, 1.41)                                                | 0.94 (0.66, 1.34) | 0.87 (0.68, 1.12) | 0.97 (0.70, 1.36) | 0.78 (0.48, 1.26) |
| High (≥45)                | 1.26 (0.84, 1.87)                                                | 1.15 (0.84, 1.57) | 1.03 (0.74, 1.44) | 2.12 (1.36, 3.32) | 0.82 (0.26, 2.53) |

Abbreviations: GAD-7: Generalized Anxiety Disorder scale; HCB: hexachlorobenzene; HOME: Home Observation for Measurement of the Environment; Mn: manganese; Pb: lead; ∑PCB<sub>4</sub>: sum of four polychlorinated biphenyl congeners; PHQ-8: Patient Health Questionnaire; p,p'-DDE: dichlorodiphenyldichloroethylene; PNSDI: prenatal social disadvantage index

<sup>a</sup> Adjusted for parental and household characteristics (prenatal social disadvantage index, maternal smoking during pregnancy, Home Observation for Measurement of the Environment score) and participant characteristics (sex, race/ethnicity, age at assessment)

<sup>b</sup> Main effect estimates from models run in datasets stratified by specific dichotomized sociodemographic/non-chemical stressor

**Table S9.** Adjusted <sup>a</sup> overall and stratified <sup>b</sup> risk ratios (95% confidence intervals) for self-report physician diagnosed (in the past 10 years) anxiety or depression at the early adult assessment associated with a doubling of chemical in single-exposure models among New Bedford Cohort participants (*n*=161-167)

| <b>Diagnosis in past 10 years</b> | <b>Risk ratio (95% confidence interval) per doubling chemical level</b> |                                |                                        |                          |                          |
|-----------------------------------|-------------------------------------------------------------------------|--------------------------------|----------------------------------------|--------------------------|--------------------------|
|                                   | <b>HCB (<i>n</i>=167)</b>                                               | <b>p,p'-DDE (<i>n</i>=167)</b> | <b>∑PCB<sub>4</sub> (<i>n</i>=167)</b> | <b>Pb (<i>n</i>=163)</b> | <b>Mn (<i>n</i>=161)</b> |
| <b>Anxiety disorder</b>           |                                                                         |                                |                                        |                          |                          |
| Total                             | 1.01 (0.72, 1.43)                                                       | 1.15 (0.93, 1.43)              | 0.99 (0.81, 1.21)                      | 1.20 (0.90, 1.61)        | 1.14 (0.69, 1.88)        |
| Sex-stratified                    |                                                                         |                                |                                        |                          |                          |
| Female                            | 1.02 (0.74, 1.42)                                                       | 1.14 (0.88, 1.48)              | 0.97 (0.78, 1.21)                      | 1.11 (0.81, 1.51)        | 1.14 (0.66, 1.96)        |
| Male                              | 0.98 (0.35, 2.73)                                                       | 1.18 (0.78, 1.80)              | 1.07 (0.59, 1.93)                      | 1.78 (0.98, 3.24)        | 1.13 (0.33, 3.87)        |
| p <sub>interaction</sub>          | 0.93                                                                    | 0.90                           | 0.77                                   | 0.15                     | 1.00                     |
| Race/ethnicity-stratified         |                                                                         |                                |                                        |                          |                          |
| Underrepresented group            | 1.36 (0.90, 2.07)                                                       | 1.27 (1.01, 1.60)              | 0.98 (0.77, 1.26)                      | 1.22 (0.80, 1.85)        | 0.71 (0.35, 1.40)        |
| Non-Hispanic White                | 0.83 (0.55, 1.26)                                                       | 0.99 (0.64, 1.53)              | 0.99 (0.73, 1.36)                      | 1.20 (0.81, 1.76)        | 1.69 (0.82, 3.50)        |
| p <sub>interaction</sub>          | 0.10                                                                    | 0.32                           | 0.96                                   | 0.95                     | 0.09                     |
| PNSDI-stratified                  |                                                                         |                                |                                        |                          |                          |
| High (≥3)                         | 0.97 (0.49, 1.92)                                                       | 1.02 (0.62, 1.67)              | 0.75 (0.51, 1.09)                      | 1.12 (0.71, 1.77)        | 1.10 (0.51, 2.35)        |
| Low (<3)                          | 1.04 (0.73, 1.48)                                                       | 1.20 (0.95, 1.53)              | 1.11 (0.87, 1.42)                      | 1.28 (0.89, 1.86)        | 1.18 (0.60, 2.30)        |
| p <sub>interaction</sub>          | 0.87                                                                    | 0.55                           | 0.09                                   | 0.65                     | 0.89                     |
| HOME-stratified                   |                                                                         |                                |                                        |                          |                          |
| Low (<45)                         | 0.94 (0.52, 1.69)                                                       | 0.77 (0.53, 1.10)              | 0.75 (0.55, 1.01)                      | 1.07 (0.66, 1.73)        | 0.91 (0.44, 1.87)        |
| High (≥45)                        | 1.07 (0.73, 1.58)                                                       | 1.38 (1.07, 1.78)              | 1.19 (0.90, 1.57)                      | 1.34 (0.93, 1.93)        | 1.50 (0.75, 3.02)        |
| p <sub>interaction</sub>          | 0.71                                                                    | 0.01                           | 0.02                                   | 0.47                     | 0.32                     |
| <b>Depression</b>                 |                                                                         |                                |                                        |                          |                          |
| Total                             | 0.95 (0.65, 1.40)                                                       | 1.13 (0.85, 1.50)              | 1.02 (0.79, 1.31)                      | 1.15 (0.82, 1.62)        | 0.81 (0.46, 1.44)        |
| Sex-stratified                    |                                                                         |                                |                                        |                          |                          |
| Female                            | 0.98 (0.67, 1.45)                                                       | 1.18 (0.83, 1.66)              | 1.02 (0.77, 1.34)                      | 1.03 (0.70, 1.51)        | 0.84 (0.44, 1.62)        |
| Male                              | 0.87 (0.38, 1.99)                                                       | 1.02 (0.61, 1.68)              | 1.04 (0.56, 1.92)                      | 1.94 (0.98, 3.85)        | 0.71 (0.21, 2.36)        |
| p <sub>interaction</sub>          | 0.80                                                                    | 0.64                           | 0.95                                   | 0.11                     | 0.81                     |
| Race/ethnicity-stratified         |                                                                         |                                |                                        |                          |                          |
| Underrepresented group            | 1.16 (0.67, 2.02)                                                       | 1.30 (0.93, 1.80)              | 0.98 (0.68, 1.41)                      | 1.05 (0.62, 1.80)        | 0.45 (0.18, 1.13)        |
| Non-Hispanic White                | 0.85 (0.55, 1.33)                                                       | 0.92 (0.56, 1.53)              | 1.06 (0.73, 1.53)                      | 1.22 (0.80, 1.87)        | 1.20 (0.54, 2.68)        |
| p <sub>interaction</sub>          | 0.38                                                                    | 0.26                           | 0.77                                   | 0.67                     | 0.12                     |
| PNSDI-stratified                  |                                                                         |                                |                                        |                          |                          |
| High (≥3)                         | 1.00 (0.52, 1.93)                                                       | 0.93 (0.52, 1.67)              | 0.70 (0.46, 1.05)                      | 0.96 (0.57, 1.62)        | 1.13 (0.52, 2.45)        |
| Low (<3)                          | 0.91 (0.57, 1.44)                                                       | 1.24 (0.89, 1.72)              | 1.26 (0.89, 1.77)                      | 1.41 (0.86, 2.32)        | 0.53 (0.23, 1.21)        |
| p <sub>interaction</sub>          | 0.82                                                                    | 0.41                           | 0.03                                   | 0.29                     | 0.20                     |
| HOME-stratified                   |                                                                         |                                |                                        |                          |                          |
| Low (<45)                         | 0.92 (0.53, 1.60)                                                       | 0.67 (0.45, 1.00)              | 0.71 (0.51, 1.00)                      | 0.86 (0.48, 1.55)        | 0.77 (0.35, 1.69)        |
| High (≥45)                        | 0.99 (0.59, 1.65)                                                       | 1.51 (1.08, 2.11)              | 1.42 (0.95, 2.12)                      | 1.58 (0.96, 2.62)        | 0.87 (0.36, 2.11)        |
| p <sub>interaction</sub>          | 0.85                                                                    | 0.002                          | 0.01                                   | 0.12                     | 0.84                     |

Abbreviations: HCB: hexachlorobenzene; HOME: Home Observation for Measurement of the Environment; Mn: manganese; Pb: lead;  $\sum$ PCB<sub>4</sub>: sum of four polychlorinated biphenyl congeners;  $p_{\text{interaction}}$ : p-value for interaction term between prenatal chemical biomarker and sociodemographic/non-chemical stressor; p,p'-DDE: dichlorodiphenyldichloroethylene; PNSDI: prenatal social disadvantage index

<sup>a</sup> Adjusted for parental and household characteristics (prenatal social disadvantage index, maternal smoking during pregnancy, Home Observation for Measurement of the Environment score) and participant characteristics (sex and race/ethnicity)

<sup>b</sup> For each outcome and chemical, risk ratios were estimated from five models: one with no interaction term and four including a product interaction term between the chemical and each of the four specified other stressors



**Table S10.** Inverse probability of censoring weighted (IPCW) <sup>a</sup> adjusted <sup>b</sup> overall and stratified <sup>c</sup> risk ratios (95% confidence intervals) for moderately elevated anxiety and depressive symptoms, measured via the Generalized Anxiety Disorder scale (GAD-7) and Patient Health Questionnaire (PHQ-8), respectively, associated with a doubling of chemical in single-exposure models, among New Bedford Cohort participants

| <b>Internalizing symptoms</b> | <b>Risk ratio (95% confidence interval) per doubling chemical level</b> |                         |                                 |                   |                   |
|-------------------------------|-------------------------------------------------------------------------|-------------------------|---------------------------------|-------------------|-------------------|
| <b>GAD-7 (Anxiety)</b>        | <b>HCB (n=189)</b>                                                      | <b>p,p'-DDE (n=189)</b> | <b>∑PCB<sub>4</sub> (n=189)</b> | <b>Pb (n=189)</b> | <b>Mn (n=184)</b> |
| Total                         | 1.43 (0.91, 2.23)                                                       | 1.14 (0.88, 1.47)       | 0.89 (0.70, 1.13)               | 1.45 (1.05, 2.01) | 0.92 (0.55, 1.55) |
| Sex-stratified                |                                                                         |                         |                                 |                   |                   |
| Female                        | 1.32 (0.87, 2.01)                                                       | 0.94 (0.59, 1.50)       | 0.88 (0.66, 1.19)               | 1.04 (0.67, 1.62) | 0.96 (0.49, 1.88) |
| Male                          | 1.51 (0.69, 3.33)                                                       | 1.32 (0.98, 1.78)       | 0.90 (0.60, 1.34)               | 2.03 (1.22, 3.38) | 0.89 (0.37, 2.16) |
| p <sub>interaction</sub>      | 0.78                                                                    | 0.23                    | 0.95                            | 0.03              | 0.90              |
| Race/ethnicity-stratified     |                                                                         |                         |                                 |                   |                   |
| Underrepresented group        | 2.18 (1.49, 3.18)                                                       | 1.34 (0.98, 1.84)       | 0.99 (0.69, 1.42)               | 1.67 (1.04, 2.67) | 0.93 (0.49, 1.78) |
| Non-Hispanic White            | 0.94 (0.58, 1.54)                                                       | 0.82 (0.51, 1.33)       | 0.78 (0.57, 1.06)               | 1.14 (0.73, 1.78) | 0.91 (0.38, 2.17) |
| p <sub>interaction</sub>      | 0.01                                                                    | 0.10                    | 0.35                            | 0.21              | 0.96              |
| PNSDI-stratified              |                                                                         |                         |                                 |                   |                   |
| High (≥3)                     | 1.35 (0.77, 2.38)                                                       | 1.19 (0.85, 1.67)       | 0.73 (0.51, 1.03)               | 1.26 (0.84, 1.88) | 1.01 (0.55, 1.85) |
| Low (<3)                      | 1.65 (0.96, 2.85)                                                       | 1.08 (0.73, 1.59)       | 1.15 (0.76, 1.72)               | 2.05 (1.24, 3.39) | 0.62 (0.24, 1.60) |
| p <sub>interaction</sub>      | 0.62                                                                    | 0.72                    | 0.08                            | 0.12              | 0.40              |
| HOME-stratified               |                                                                         |                         |                                 |                   |                   |
| Low (<45)                     | 1.37 (0.74, 2.54)                                                       | 0.89 (0.61, 1.30)       | 0.82 (0.61, 1.11)               | 1.27 (0.84, 1.91) | 0.85 (0.48, 1.51) |
| High (≥45)                    | 1.56 (1.00, 2.45)                                                       | 1.44 (1.08, 1.92)       | 1.00 (0.65, 1.55)               | 1.97 (1.22, 3.17) | 1.21 (0.38, 3.85) |
| p <sub>interaction</sub>      | 0.74                                                                    | 0.05                    | 0.47                            | 0.16              | 0.59              |
| <b>PHQ-8 (Depressive)</b>     | <b>HCB (n=190)</b>                                                      | <b>p,p'-DDE (n=190)</b> | <b>∑PCB<sub>4</sub> (n=190)</b> | <b>Pb (n=190)</b> | <b>Mn (n=185)</b> |
| Total                         | 1.12 (0.83, 1.52)                                                       | 1.04 (0.83, 1.32)       | 0.86 (0.70, 1.07)               | 1.06 (0.80, 1.41) | 0.77 (0.48, 1.23) |
| Sex-stratified                |                                                                         |                         |                                 |                   |                   |
| Female                        | 1.23 (0.89, 1.72)                                                       | 0.89 (0.61, 1.28)       | 0.86 (0.66, 1.12)               | 1.01 (0.70, 1.44) | 0.95 (0.52, 1.71) |
| Male                          | 1.05 (0.70, 1.59)                                                       | 1.20 (0.89, 1.63)       | 0.86 (0.61, 1.23)               | 1.12 (0.70, 1.78) | 0.60 (0.27, 1.34) |
| p <sub>interaction</sub>      | 0.56                                                                    | 0.22                    | 0.98                            | 0.74              | 0.38              |
| Race/ethnicity-stratified     |                                                                         |                         |                                 |                   |                   |
| Underrepresented group        | 1.45 (0.94, 2.24)                                                       | 1.17 (0.85, 1.62)       | 0.93 (0.63, 1.37)               | 1.14 (0.73, 1.78) | 0.63 (0.33, 1.21) |
| Non-Hispanic White            | 0.95 (0.71, 1.29)                                                       | 0.91 (0.65, 1.27)       | 0.81 (0.62, 1.06)               | 0.98 (0.68, 1.40) | 0.95 (0.45, 2.01) |
| p <sub>interaction</sub>      | 0.14                                                                    | 0.28                    | 0.60                            | 0.61              | 0.43              |
| PNSDI-stratified              |                                                                         |                         |                                 |                   |                   |
| High (≥3)                     | 1.04 (0.73, 1.48)                                                       | 0.88 (0.61, 1.27)       | 0.63 (0.43, 0.93)               | 0.66 (0.44, 1.00) | 0.71 (0.41, 1.24) |
| Low (<3)                      | 1.33 (0.89, 1.98)                                                       | 1.20 (0.91, 1.58)       | 1.14 (0.84, 1.56)               | 2.01 (1.34, 3.01) | 0.95 (0.37, 2.43) |
| p <sub>interaction</sub>      | 0.37                                                                    | 0.19                    | 0.02                            | 0.0002            | 0.61              |
| HOME-stratified               |                                                                         |                         |                                 |                   |                   |
| Low (<45)                     | 1.10 (0.75, 1.62)                                                       | 1.04 (0.74, 1.46)       | 0.83 (0.64, 1.09)               | 0.86 (0.58, 1.26) | 0.74 (0.45, 1.22) |
| High (≥45)                    | 1.18 (0.80, 1.74)                                                       | 1.05 (0.76, 1.45)       | 0.91 (0.62, 1.33)               | 1.62 (1.01, 2.61) | 0.88 (0.27, 2.89) |
| p <sub>interaction</sub>      | 0.82                                                                    | 0.96                    | 0.73                            | 0.05              | 0.79              |

Abbreviations: GAD-7: Generalized Anxiety Disorder scale; HCB: hexachlorobenzene; HOME: Home Observation for Measurement of the Environment; IPCW: inverse probability of censoring weighting; Mn: manganese; Pb: lead;  $\sum$ PCB<sub>4</sub>: sum of four polychlorinated biphenyl congeners; PHQ-8: Patient Health Questionnaire;  $p_{\text{interaction}}$ : p-value for interaction term between prenatal chemical biomarker and sociodemographic/non-chemical stressor; p,p'-DDE: dichlorodiphenyldichloroethylene; PNSDI: prenatal social disadvantage index

<sup>a</sup> Weights calculated from 622 participants with full data on prenatal chemical concentrations (HCB, p,p'-DDE,  $\sum$ PCB<sub>4</sub>, and Pb); parental and household characteristics (maternal age, education, marital status, household income, smoking during pregnancy, obstetrical risk score; paternal education); and participant characteristics (sex, race/ethnicity); sample sizes differ from complete case single-chemical analyses because 1) participants with weighted PNSDI scores (i.e., missing data on one of the five variables used to derive the PNSDI) were not included in any IPCW analysis and 2) participants who were missing a measure of cord blood lead were not included in IPCW analyses for organochlorine and manganese exposures

<sup>b</sup> Adjusted for parental and household characteristics (prenatal social disadvantage index, prenatal smoking, Home Observation for Measurement of the Environment score at 15-year assessment) and participant characteristics (sex, race/ethnicity, age at assessment)

<sup>c</sup> For each outcome and chemical, risk ratios were estimated from five models: one with no interaction term and four including a product interaction term between the chemical and each of the four specified other stressors

**Table S11.** Adjusted <sup>a</sup> overall and stratified <sup>b</sup> risk ratios (95% confidence intervals) for moderately elevated anxiety and depressive symptoms, measured via the Generalized Anxiety Disorder scale (GAD-7) and Patient Health Questionnaire (PHQ-8), respectively, associated with a doubling of hexachlorobenzene (HCB) in single-exposure models among New Bedford Cohort participants, when excluding the minimum outlier HCB value

| Internalizing symptoms    | Risk ratio (95% confidence interval) per doubling HCB level | <i>p</i> <sub>interaction</sub> |
|---------------------------|-------------------------------------------------------------|---------------------------------|
| <b>GAD-7 (n=202)</b>      |                                                             |                                 |
| Total                     | 1.50 (1.09, 2.07)                                           |                                 |
| Sex-stratified            |                                                             | 0.06                            |
| Female                    | 1.31 (0.89, 1.93)                                           |                                 |
| Male                      | 2.32 (1.49, 3.61)                                           |                                 |
| Race/ethnicity-stratified |                                                             | 0.27                            |
| Underrepresented group    | 1.88 (1.17, 3.00)                                           |                                 |
| Non-Hispanic White        | 1.30 (0.85, 2.00)                                           |                                 |
| PNSDI-stratified          |                                                             | 0.73                            |
| High (≥3)                 | 1.58 (1.03, 2.44)                                           |                                 |
| Low (<3)                  | 1.41 (0.87, 2.29)                                           |                                 |
| HOME-stratified           |                                                             | 0.40                            |
| Low (<45)                 | 1.66 (1.10, 2.51)                                           |                                 |
| High (≥45)                | 1.28 (0.81, 2.03)                                           |                                 |
| <b>PHQ-8 (n=203)</b>      |                                                             |                                 |
| Total                     | 1.20 (0.93, 1.56)                                           |                                 |
| Sex-stratified            |                                                             | 0.96                            |
| Female                    | 1.21 (0.89, 1.65)                                           |                                 |
| Male                      | 1.19 (0.75, 1.89)                                           |                                 |
| Race/ethnicity-stratified |                                                             | 0.78                            |
| Underrepresented group    | 1.27 (0.81, 1.99)                                           |                                 |
| Non-Hispanic White        | 1.17 (0.85, 1.61)                                           |                                 |
| PNSDI-stratified          |                                                             | 0.60                            |
| High (≥3)                 | 1.12 (0.78, 1.61)                                           |                                 |
| Low (<3)                  | 1.29 (0.89, 1.87)                                           |                                 |
| HOME-stratified           |                                                             | 0.77                            |
| Low (<45)                 | 1.17 (0.82, 1.65)                                           |                                 |
| High (≥45)                | 1.26 (0.84, 1.89)                                           |                                 |

Abbreviation: GAD-7: Generalized Anxiety Disorder scale; HCB: hexachlorobenzene; HOME: Home Observation for Measurement of the Environment; *p*<sub>interaction</sub>: p-value for interaction term between prenatal chemical biomarker and sociodemographic/non-chemical stressor; PHQ-8: Patient Health Questionnaire; PNSDI: prenatal social disadvantage index

<sup>a</sup> Adjusted for parental and household characteristics (prenatal social disadvantage index, maternal smoking during pregnancy, Home Observation for Measurement of the Environment score) and participant characteristics (sex, race/ethnicity, age at assessment)

<sup>b</sup> For each outcome, risk ratios were estimated from five models: one with no interaction term and four including a product interaction term between HCB and each of the four specified other stressors

**Table S12.** Adjusted <sup>a</sup> overall and stratified <sup>b</sup> risk ratios (95% confidence intervals) for moderately elevated anxiety and depressive symptoms, measured via the Generalized Anxiety Disorder scale (GAD-7) and Patient Health Questionnaire (PHQ-8), respectively, associated with a doubling of chemical in five-exposure models, among New Bedford Cohort participants

| <b>Internalizing symptoms</b> | <b>Risk ratio (95% confidence interval) per doubling chemical level</b> |                   |                         |                         |                   |
|-------------------------------|-------------------------------------------------------------------------|-------------------|-------------------------|-------------------------|-------------------|
|                               | <b>GAD-7 (n=187)</b>                                                    | <b>HCB</b>        | <b>p,p'-DDE</b>         | <b>∑PCB<sub>4</sub></b> | <b>Pb</b>         |
| Total                         | 1.41 (0.89, 2.23)                                                       | 1.28 (0.84, 1.94) | 0.72 (0.52, 1.02)       | 1.47 (1.04, 2.09)       | 0.78 (0.43, 1.44) |
| Sex-stratified                |                                                                         |                   |                         |                         |                   |
| Female                        | 1.48 (0.96, 2.28)                                                       | 1.26 (0.71, 2.23) | 0.78 (0.52, 1.17)       | 1.34 (0.89, 2.02)       | 0.97 (0.50, 1.88) |
| Male                          | 1.32 (0.37, 4.67)                                                       | 1.29 (0.83, 2.01) | 0.66 (0.41, 1.04)       | 1.82 (1.08, 3.09)       | 0.46 (0.14, 1.50) |
| p <sub>interaction</sub>      | 0.87                                                                    | 0.95              | 0.56                    | 0.30                    | 0.27              |
| Race/ethnicity-stratified     |                                                                         |                   |                         |                         |                   |
| Underrepresented group        | 1.71 (0.99, 2.97)                                                       | 1.56 (0.87, 2.80) | 0.71 (0.41, 1.25)       | 1.35 (0.87, 2.10)       | 0.75 (0.30, 1.86) |
| Non-Hispanic White            | 1.19 (0.68, 2.07)                                                       | 1.06 (0.50, 2.25) | 0.77 (0.47, 1.24)       | 1.46 (1.01, 2.10)       | 0.69 (0.29, 1.62) |
| p <sub>interaction</sub>      | 0.36                                                                    | 0.42              | 0.84                    | 0.79                    | 0.89              |
| PNSDI-stratified              |                                                                         |                   |                         |                         |                   |
| High (≥3)                     | 1.36 (0.69, 2.69)                                                       | 1.41 (0.79, 2.52) | 0.45 (0.24, 0.84)       | 1.36 (0.89, 2.06)       | 1.10 (0.52, 2.37) |
| Low (<3)                      | 1.36 (0.71, 2.61)                                                       | 1.24 (0.81, 1.91) | 1.01 (0.65, 1.59)       | 1.71 (1.04, 2.83)       | 0.69 (0.27, 1.73) |
| p <sub>interaction</sub>      | 1.00                                                                    | 0.72              | 0.03                    | 0.44                    | 0.41              |
| HOME-stratified               |                                                                         |                   |                         |                         |                   |
| Low (<45)                     | 1.47 (0.77, 2.81)                                                       | 0.89 (0.53, 1.48) | 0.72 (0.46, 1.11)       | 1.41 (0.94, 2.12)       | 0.96 (0.44, 2.10) |
| High (≥45)                    | 1.01 (0.53, 1.91)                                                       | 1.68 (1.19, 2.37) | 0.80 (0.49, 1.31)       | 1.70 (1.05, 2.76)       | 0.78 (0.25, 2.43) |
| p <sub>interaction</sub>      | 0.40                                                                    | 0.04              | 0.73                    | 0.54                    | 0.76              |
| <b>PHQ-8 (n=188)</b>          | <b>HCB</b>                                                              | <b>p,p'-DDE</b>   | <b>∑PCB<sub>4</sub></b> | <b>Pb</b>               | <b>Mn</b>         |
| Total                         | 1.16 (0.85, 1.60)                                                       | 1.15 (0.83, 1.59) | 0.80 (0.62, 1.05)       | 1.20 (0.90, 1.59)       | 0.77 (0.46, 1.29) |
| Sex-stratified                |                                                                         |                   |                         |                         |                   |
| Female                        | 1.32 (0.94, 1.86)                                                       | 1.07 (0.69, 1.67) | 0.84 (0.60, 1.17)       | 1.20 (0.86, 1.69)       | 0.93 (0.51, 1.71) |
| Male                          | 0.95 (0.58, 1.55)                                                       | 1.49 (0.95, 2.32) | 0.74 (0.47, 1.17)       | 1.06 (0.64, 1.75)       | 0.45 (0.14, 1.42) |
| p <sub>interaction</sub>      | 0.27                                                                    | 0.31              | 0.67                    | 0.67                    | 0.27              |
| Race/ethnicity-stratified     |                                                                         |                   |                         |                         |                   |
| Underrepresented group        | 1.26 (0.74, 2.15)                                                       | 1.28 (0.77, 2.12) | 0.82 (0.48, 1.39)       | 1.11 (0.66, 1.89)       | 0.65 (0.26, 1.60) |
| Non-Hispanic White            | 1.12 (0.77, 1.61)                                                       | 1.08 (0.69, 1.71) | 0.82 (0.58, 1.16)       | 1.21 (0.89, 1.66)       | 0.81 (0.40, 1.64) |
| p <sub>interaction</sub>      | 0.72                                                                    | 0.63              | 1.00                    | 0.78                    | 0.70              |
| PNSDI-stratified              |                                                                         |                   |                         |                         |                   |
| High (≥3)                     | 0.98 (0.67, 1.43)                                                       | 1.37 (0.81, 2.31) | 0.54 (0.33, 0.90)       | 0.87 (0.56, 1.33)       | 1.00 (0.52, 1.94) |
| Low (<3)                      | 1.15 (0.74, 1.79)                                                       | 1.24 (0.87, 1.76) | 0.99 (0.71, 1.38)       | 1.91 (1.23, 2.98)       | 0.99 (0.40, 2.49) |
| p <sub>interaction</sub>      | 0.66                                                                    | 0.89              | 0.07                    | 0.01                    | 0.89              |
| HOME-stratified               |                                                                         |                   |                         |                         |                   |
| Low (<45)                     | 1.08 (0.71, 1.64)                                                       | 1.11 (0.60, 2.05) | 0.79 (0.51, 1.22)       | 0.96 (0.63, 1.45)       | 0.88 (0.50, 1.55) |
| High (≥45)                    | 1.13 (0.68, 1.87)                                                       | 1.20 (0.78, 1.84) | 0.88 (0.59, 1.33)       | 1.76 (1.15, 2.67)       | 0.90 (0.30, 2.70) |
| p <sub>interaction</sub>      | 0.90                                                                    | 0.85              | 0.72                    | 0.03                    | 0.97              |

Abbreviations: GAD-7: Generalized Anxiety Disorder scale; HCB: hexachlorobenzene; HOME: Home Observation for Measurement of the Environment; Mn: manganese; Pb: lead;  $\sum$ PCB<sub>4</sub>: sum of four polychlorinated biphenyl congeners; PHQ-8: Patient Health Questionnaire;  $p_{\text{interaction}}$ : p-value for interaction term between prenatal chemical biomarker and sociodemographic/non-chemical stressor; p,p'-DDE: dichlorodiphenyldichloroethylene; PNSDI: prenatal social disadvantage index

<sup>a</sup> Adjusted for parental and household characteristics (prenatal social disadvantage index, maternal smoking during pregnancy, Home Observation for Measurement of the Environment score), participant characteristics (sex, race/ethnicity, age at assessment), and other biomarkers of prenatal chemical exposures

<sup>b</sup> For each outcome, risk ratios were estimated from five models: one with no interaction term(s) and four including five product interaction terms between each chemical and each of the four specified other stressors

**Table S13.** Adjusted <sup>a</sup> overall and stratified <sup>b</sup> risk ratios (95% confidence intervals) for moderately elevated anxiety and depressive symptoms, measured via the Generalized Anxiety Disorder scale (GAD-7) and Patient Health Questionnaire (PHQ-8), respectively, associated with a doubling of organochlorine exposure in single-exposure models additionally adjusted for prenatal consumption of seafood and local produce, among New Bedford Cohort participants

| <b>Internalizing symptoms</b>     | <b>Risk ratio (95% confidence interval) per doubling organochlorine level</b> |                   |                         |
|-----------------------------------|-------------------------------------------------------------------------------|-------------------|-------------------------|
|                                   | <b>HCB</b>                                                                    | <b>p,p'-DDE</b>   | <b>∑PCB<sub>4</sub></b> |
| <b>GAD-7 (Anxiety) (n=182)</b>    |                                                                               |                   |                         |
| Total                             | 1.22 (0.81, 1.84)                                                             | 1.20 (0.85, 1.69) | 0.96 (0.73, 1.27)       |
| Sex-stratified                    |                                                                               |                   |                         |
| Female                            | 1.23 (0.77, 1.95)                                                             | 1.20 (0.78, 1.84) | 1.03 (0.75, 1.40)       |
| Male                              | 1.21 (0.56, 2.63)                                                             | 1.19 (0.77, 1.83) | 0.77 (0.46, 1.28)       |
| P <sub>interaction</sub>          | 0.97                                                                          | 0.98              | 0.35                    |
| Race/ethnicity-stratified         |                                                                               |                   |                         |
| Underrepresented group            | 1.65 (0.98, 2.79)                                                             | 1.52 (1.07, 2.17) | 1.09 (0.72, 1.65)       |
| Non-Hispanic White                | 1.04 (0.64, 1.70)                                                             | 0.95 (0.46, 1.95) | 0.87 (0.60, 1.25)       |
| P <sub>interaction</sub>          | 0.21                                                                          | 0.22              | 0.45                    |
| PNSDI-stratified                  |                                                                               |                   |                         |
| High (≥3)                         | 1.15 (0.70, 1.88)                                                             | 0.95 (0.62, 1.45) | 0.66 (0.46, 0.94)       |
| Low (<3)                          | 1.35 (0.72, 2.55)                                                             | 1.36 (0.92, 2.03) | 1.35 (0.85, 2.14)       |
| P <sub>interaction</sub>          | 0.68                                                                          | 0.22              | 0.01                    |
| HOME-stratified                   |                                                                               |                   |                         |
| Low (<45)                         | 1.19 (0.69, 2.04)                                                             | 0.75 (0.49, 1.16) | 0.79 (0.57, 1.09)       |
| High (≥45)                        | 1.28 (0.72, 2.29)                                                             | 1.61 (1.21, 2.14) | 1.21 (0.74, 1.98)       |
| P <sub>interaction</sub>          | 0.85                                                                          | 0.004             | 0.16                    |
| <b>PHQ-8 (Depressive) (n=183)</b> |                                                                               |                   |                         |
| Total                             | 1.08 (0.80, 1.47)                                                             | 1.08 (0.82, 1.43) | 1.00 (0.80, 1.26)       |
| Sex-stratified                    |                                                                               |                   |                         |
| Female                            | 1.17 (0.81, 1.70)                                                             | 1.06 (0.75, 1.51) | 1.04 (0.80, 1.35)       |
| Male                              | 0.94 (0.64, 1.39)                                                             | 1.13 (0.75, 1.71) | 0.90 (0.59, 1.38)       |
| P <sub>interaction</sub>          | 0.41                                                                          | 0.81              | 0.59                    |
| Race/ethnicity-stratified         |                                                                               |                   |                         |
| Underrepresented group            | 1.34 (0.81, 2.20)                                                             | 1.20 (0.83, 1.73) | 1.04 (0.69, 1.56)       |
| Non-Hispanic White                | 0.99 (0.70, 1.40)                                                             | 1.01 (0.67, 1.53) | 0.98 (0.73, 1.31)       |
| P <sub>interaction</sub>          | 0.34                                                                          | 0.54              | 0.82                    |
| PNSDI-stratified                  |                                                                               |                   |                         |
| High (≥3)                         | 1.00 (0.69, 1.43)                                                             | 0.76 (0.51, 1.12) | 0.67 (0.47, 0.96)       |
| Low (<3)                          | 1.21 (0.77, 1.90)                                                             | 1.27 (0.96, 1.69) | 1.34 (0.94, 1.90)       |
| P <sub>interaction</sub>          | 0.51                                                                          | 0.03              | 0.01                    |
| HOME-stratified                   |                                                                               |                   |                         |
| Low (<45)                         | 1.01 (0.69, 1.47)                                                             | 0.93 (0.64, 1.34) | 0.93 (0.70, 1.23)       |
| High (≥45)                        | 1.25 (0.77, 2.02)                                                             | 1.24 (0.90, 1.71) | 1.10 (0.73, 1.65)       |
| P <sub>interaction</sub>          | 0.50                                                                          | 0.25              | 0.52                    |

Abbreviations: GAD-7: Generalized Anxiety Disorder scale; HCB: hexachlorobenzene; HOME: Home Observation for Measurement of the Environment;  $\Sigma$ PCB<sub>4</sub>: sum of four polychlorinated biphenyl congeners; PHQ-8: Patient Health Questionnaire;  $p_{\text{interaction}}$ : p-value for interaction term between prenatal chemical biomarker and sociodemographic/non-chemical stressor; p,p'-DDE: dichlorodiphenyldichloroethylene; PNSDI: prenatal social disadvantage index

<sup>a</sup> Adjusted for parental and household characteristics (prenatal social disadvantage index, maternal smoking during pregnancy, Home Observation for Measurement of the Environment score; maternal prenatal seafood consumption, local produce consumption) and participant characteristics (sex, race/ethnicity, age at assessment)

<sup>b</sup> For each outcome, risk ratios were estimated from five models: one with no interaction term(s) and four including five product interaction terms between each chemical and each of the four specified other stressors

**Table S14.** Adjusted <sup>a</sup> overall and stratified <sup>b</sup> risk ratios (95% confidence intervals) for moderately elevated anxiety and depressive symptoms, measured via the Generalized Anxiety Disorder scale (GAD-7) and Patient Health Questionnaire (PHQ-8), respectively, associated with a doubling of chemical in single-exposure models, among New Bedford Cohort participants who had data available on regular medication use at the early adult assessment (*n*=153-161)

| Internalizing symptoms    | Risk ratio (95% confidence interval) per doubling chemical level |                           |                                |                                        |                          |                          |
|---------------------------|------------------------------------------------------------------|---------------------------|--------------------------------|----------------------------------------|--------------------------|--------------------------|
|                           | GAD-7 (Anxiety)                                                  | HCB ( <i>n</i> =160)      | p,p'-DDE ( <i>n</i> =160)      | ∑PCB <sub>4</sub> ( <i>n</i> =160)     | Pb ( <i>n</i> =155)      | Mn ( <i>n</i> =153)      |
| Total                     |                                                                  | 1.21 (0.82, 1.80)         | 1.24 (0.91, 1.69)              | 0.89 (0.69, 1.15)                      | 1.17 (0.82, 1.68)        | 1.09 (0.59, 2.01)        |
| Sex-stratified            |                                                                  |                           |                                |                                        |                          |                          |
| Female                    |                                                                  | 1.23 (0.82, 1.85)         | 1.27 (0.84, 1.91)              | 0.91 (0.67, 1.23)                      | 1.05 (0.70, 1.58)        | 1.17 (0.60, 2.29)        |
| Male                      |                                                                  | 1.18 (0.48, 2.90)         | 1.19 (0.80, 1.77)              | 0.83 (0.53, 1.30)                      | 1.97 (0.95, 4.09)        | 0.76 (0.18, 3.22)        |
| P <sub>interaction</sub>  |                                                                  | 0.94                      | 0.82                           | 0.76                                   | 0.11                     | 0.60                     |
| Race/ethnicity-stratified |                                                                  |                           |                                |                                        |                          |                          |
| Underrepresented group    |                                                                  | 1.94 (1.20, 3.15)         | 1.43 (1.01, 2.03)              | 1.02 (0.69, 1.50)                      | 1.19 (0.69, 2.03)        | 0.90 (0.41, 1.95)        |
| Non-Hispanic White        |                                                                  | 0.91 (0.61, 1.36)         | 0.99 (0.57, 1.73)              | 0.79 (0.59, 1.07)                      | 1.16 (0.75, 1.80)        | 1.29 (0.53, 3.14)        |
| P <sub>interaction</sub>  |                                                                  | 0.02                      | 0.26                           | 0.33                                   | 0.95                     | 0.54                     |
| PNSDI-stratified          |                                                                  |                           |                                |                                        |                          |                          |
| High (≥3)                 |                                                                  | 1.24 (0.73, 2.09)         | 0.93 (0.58, 1.47)              | 0.66 (0.46, 0.95)                      | 1.07 (0.69, 1.66)        | 1.23 (0.59, 2.57)        |
| Low (<3)                  |                                                                  | 1.17 (0.65, 2.12)         | 1.56 (1.06, 2.32)              | 1.14 (0.74, 1.76)                      | 1.52 (0.85, 2.71)        | 0.77 (0.25, 2.43)        |
| P <sub>interaction</sub>  |                                                                  | 0.90                      | 0.09                           | 0.06                                   | 0.31                     | 0.51                     |
| HOME-stratified           |                                                                  |                           |                                |                                        |                          |                          |
| Low (<45)                 |                                                                  | 1.17 (0.67, 2.03)         | 0.95 (0.65, 1.41)              | 0.72 (0.54, 0.97)                      | 0.98 (0.61, 1.59)        | 0.98 (0.47, 2.03)        |
| High (≥45)                |                                                                  | 1.29 (0.78, 2.16)         | 1.49 (0.99, 2.25)              | 1.10 (0.68, 1.76)                      | 1.82 (1.05, 3.16)        | 1.43 (0.48, 4.25)        |
| P <sub>interaction</sub>  |                                                                  | 0.79                      | 0.12                           | 0.14                                   | 0.07                     | 0.57                     |
| <b>PHQ-8 (Depressive)</b> |                                                                  | <b>HCB (<i>n</i>=161)</b> | <b>p,p'-DDE (<i>n</i>=161)</b> | <b>∑PCB<sub>4</sub> (<i>n</i>=161)</b> | <b>Pb (<i>n</i>=156)</b> | <b>Mn (<i>n</i>=154)</b> |
| Total                     |                                                                  | 1.07 (0.82, 1.40)         | 1.12 (0.84, 1.49)              | 0.88 (0.71, 1.09)                      | 1.04 (0.79, 1.37)        | 0.86 (0.52, 1.44)        |
| Sex-stratified            |                                                                  |                           |                                |                                        |                          |                          |
| Female                    |                                                                  | 1.20 (0.84, 1.72)         | 1.07 (0.72, 1.61)              | 0.88 (0.68, 1.14)                      | 1.01 (0.74, 1.38)        | 0.93 (0.52, 1.66)        |
| Male                      |                                                                  | 0.91 (0.69, 1.20)         | 1.20 (0.84, 1.69)              | 0.88 (0.60, 1.28)                      | 1.19 (0.61, 2.33)        | 0.65 (0.22, 1.95)        |
| P <sub>interaction</sub>  |                                                                  | 0.25                      | 0.69                           | 1.00                                   | 0.66                     | 0.57                     |
| Race/ethnicity-stratified |                                                                  |                           |                                |                                        |                          |                          |
| Underrepresented group    |                                                                  | 1.33 (0.85, 2.07)         | 1.20 (0.84, 1.70)              | 0.92 (0.63, 1.35)                      | 1.01 (0.65, 1.57)        | 0.71 (0.34, 1.48)        |
| Non-Hispanic White        |                                                                  | 0.95 (0.71, 1.28)         | 1.02 (0.65, 1.61)              | 0.85 (0.65, 1.10)                      | 1.06 (0.76, 1.48)        | 0.99 (0.49, 2.00)        |
| P <sub>interaction</sub>  |                                                                  | 0.24                      | 0.59                           | 0.73                                   | 0.91                     | 0.52                     |
| PNSDI-stratified          |                                                                  |                           |                                |                                        |                          |                          |
| High (≥3)                 |                                                                  | 1.02 (0.77, 1.35)         | 0.84 (0.59, 1.20)              | 0.66 (0.48, 0.91)                      | 0.80 (0.55, 1.17)        | 0.85 (0.47, 1.51)        |
| Low (<3)                  |                                                                  | 1.22 (0.69, 2.14)         | 1.47 (1.00, 2.16)              | 1.16 (0.81, 1.65)                      | 1.97 (1.18, 3.28)        | 0.91 (0.30, 2.70)        |
| P <sub>interaction</sub>  |                                                                  | 0.58                      | 0.03                           | 0.02                                   | 0.004                    | 0.91                     |
| HOME-stratified           |                                                                  |                           |                                |                                        |                          |                          |
| Low (<45)                 |                                                                  | 1.00 (0.75, 1.33)         | 1.14 (0.82, 1.60)              | 0.81 (0.64, 1.04)                      | 0.80 (0.53, 1.20)        | 0.81 (0.47, 1.41)        |
| High (≥45)                |                                                                  | 1.27 (0.75, 2.12)         | 1.09 (0.67, 1.76)              | 0.99 (0.63, 1.56)                      | 1.98 (1.19, 3.30)        | 1.01 (0.33, 3.10)        |



$p_{\text{interaction}}$

0.44

0.82

0.45

0.01

0.74

---

Abbreviations: GAD-7: Generalized Anxiety Disorder scale; HCB: hexachlorobenzene; HOME: Home Observation for Measurement of the Environment; Mn: manganese; Pb: lead;  $\Sigma$ PCB<sub>4</sub>: sum of four polychlorinated biphenyl congeners; PHQ-8: Patient Health Questionnaire;  $p_{\text{interaction}}$ : p-value for interaction term between prenatal chemical biomarker and sociodemographic/non-chemical stressor; p,p'-DDE: dichlorodiphenyldichloroethylene; PNSDI: prenatal social disadvantage index

<sup>a</sup> Adjusted for parental and household characteristics (prenatal social disadvantage index, maternal smoking during pregnancy, Home Observation for Measurement of the Environment score) and participant characteristics (sex, race/ethnicity, age at assessment)

<sup>b</sup> For each outcome and chemical, risk ratios were estimated from five models: one with no interaction term and four including a product interaction term between the chemical and each of the four specified other stressors

**Table S15.** Adjusted <sup>a</sup> overall and stratified <sup>b</sup> risk ratios (95% confidence intervals) for moderately elevated anxiety and depressive symptoms, measured via the Generalized Anxiety Disorder scale (GAD-7) and Patient Health Questionnaire (PHQ-8), respectively, associated with a doubling of chemical in single-exposure models, among New Bedford Cohort participants who had data available on medication use at the early adult assessment and did not report regularly using psychotropic medications (*n*=139-147)

| <b>Internalizing symptoms</b> | <b>Risk ratio (95% confidence interval) per doubling chemical level</b> |                                |                                        |                          |                          |
|-------------------------------|-------------------------------------------------------------------------|--------------------------------|----------------------------------------|--------------------------|--------------------------|
| <b>GAD-7 (Anxiety)</b>        | <b>HCB (<i>n</i>=146)</b>                                               | <b>p,p'-DDE (<i>n</i>=146)</b> | <b>∑PCB<sub>4</sub> (<i>n</i>=146)</b> | <b>Pb (<i>n</i>=141)</b> | <b>Mn (<i>n</i>=139)</b> |
| Total                         | 1.38 (0.97, 1.97)                                                       | 1.13 (0.78, 1.63)              | 0.86 (0.61, 1.22)                      | 1.10 (0.69, 1.76)        | 1.11 (0.50, 2.46)        |
| Sex-stratified                |                                                                         |                                |                                        |                          |                          |
| Female                        | 1.20 (0.78, 1.86)                                                       | 1.15 (0.70, 1.90)              | 0.88 (0.58, 1.33)                      | 0.97 (0.60, 1.56)        | 1.30 (0.56, 3.04)        |
| Male                          | 2.24 (1.31, 3.81)                                                       | 1.07 (0.71, 1.61)              | 0.82 (0.48, 1.42)                      | 1.96 (0.62, 6.17)        | 0.50 (0.10, 2.62)        |
| P <sub>interaction</sub>      | 0.09                                                                    | 0.82                           | 0.86                                   | 0.23                     | 0.30                     |
| Race/ethnicity-stratified     |                                                                         |                                |                                        |                          |                          |
| Underrepresented group        | 1.87 (1.08, 3.22)                                                       | 1.46 (0.99, 2.15)              | 1.11 (0.72, 1.71)                      | 1.29 (0.64, 2.61)        | 0.99 (0.36, 2.66)        |
| Non-Hispanic White            | 1.02 (0.64, 1.63)                                                       | 0.68 (0.35, 1.32)              | 0.70 (0.49, 1.01)                      | 0.95 (0.58, 1.55)        | 1.24 (0.38, 4.00)        |
| P <sub>interaction</sub>      | 0.10                                                                    | 0.05                           | 0.12                                   | 0.43                     | 0.77                     |
| PNSDI-stratified              |                                                                         |                                |                                        |                          |                          |
| High (≥3)                     | 1.80 (1.22, 2.65)                                                       | 0.78 (0.46, 1.34)              | 0.58 (0.32, 1.03)                      | 0.95 (0.53, 1.72)        | 1.45 (0.55, 3.79)        |
| Low (<3)                      | 0.88 (0.48, 1.62)                                                       | 1.38 (0.90, 2.14)              | 1.14 (0.66, 1.96)                      | 1.41 (0.75, 2.64)        | 0.60 (0.15, 2.42)        |
| P <sub>interaction</sub>      | 0.05                                                                    | 0.10                           | 0.09                                   | 0.33                     | 0.31                     |
| HOME-stratified               |                                                                         |                                |                                        |                          |                          |
| Low (<45)                     | 1.67 (1.12, 2.48)                                                       | 0.97 (0.62, 1.51)              | 0.69 (0.45, 1.05)                      | 0.86 (0.45, 1.62)        | 1.04 (0.39, 2.73)        |
| High (≥45)                    | 1.04 (0.58, 1.86)                                                       | 1.25 (0.75, 2.08)              | 1.04 (0.58, 1.86)                      | 1.73 (0.90, 3.30)        | 1.28 (0.35, 4.74)        |
| P <sub>interaction</sub>      | 0.19                                                                    | 0.46                           | 0.27                                   | 0.12                     | 0.79                     |
| <b>PHQ-8 (Depressive)</b>     | <b>HCB (<i>n</i>=147)</b>                                               | <b>p,p'-DDE (<i>n</i>=147)</b> | <b>∑PCB<sub>4</sub> (<i>n</i>=147)</b> | <b>Pb (<i>n</i>=142)</b> | <b>Mn (<i>n</i>=140)</b> |
| Total                         | 1.16 (0.85, 1.58)                                                       | 1.12 (0.81, 1.54)              | 0.85 (0.66, 1.09)                      | 0.98 (0.71, 1.37)        | 0.91 (0.49, 1.68)        |
| Sex-stratified                |                                                                         |                                |                                        |                          |                          |
| Female                        | 1.15 (0.76, 1.74)                                                       | 0.94 (0.57, 1.56)              | 0.82 (0.58, 1.14)                      | 0.85 (0.59, 1.22)        | 0.94 (0.46, 1.91)        |
| Male                          | 1.17 (0.74, 1.87)                                                       | 1.42 (1.02, 1.98)              | 0.92 (0.63, 1.36)                      | 1.51 (0.77, 2.95)        | 0.83 (0.25, 2.77)        |
| P <sub>interaction</sub>      | 0.95                                                                    | 0.18                           | 0.64                                   | 0.15                     | 0.86                     |
| Race/ethnicity-stratified     |                                                                         |                                |                                        |                          |                          |
| Underrepresented group        | 1.34 (0.81, 2.21)                                                       | 1.33 (0.91, 1.94)              | 0.89 (0.56, 1.41)                      | 1.06 (0.65, 1.71)        | 1.05 (0.48, 2.28)        |
| Non-Hispanic White            | 1.01 (0.67, 1.54)                                                       | 0.86 (0.53, 1.40)              | 0.83 (0.61, 1.12)                      | 0.93 (0.60, 1.43)        | 0.82 (0.34, 1.98)        |
| P <sub>interaction</sub>      | 0.42                                                                    | 0.17                           | 0.81                                   | 0.69                     | 0.67                     |
| PNSDI-stratified              |                                                                         |                                |                                        |                          |                          |
| High (≥3)                     | 1.29 (0.92, 1.80)                                                       | 0.98 (0.66, 1.48)              | 0.68 (0.47, 0.98)                      | 0.75 (0.49, 1.15)        | 0.88 (0.43, 1.82)        |
| Low (<3)                      | 0.92 (0.49, 1.74)                                                       | 1.25 (0.79, 1.98)              | 1.06 (0.69, 1.63)                      | 1.55 (0.92, 2.60)        | 0.98 (0.29, 3.39)        |
| P <sub>interaction</sub>      | 0.36                                                                    | 0.42                           | 0.13                                   | 0.03                     | 0.89                     |
| HOME-stratified               |                                                                         |                                |                                        |                          |                          |
| Low (<45)                     | 1.13 (0.80, 1.60)                                                       | 1.29 (0.91, 1.84)              | 0.86 (0.65, 1.12)                      | 0.69 (0.43, 1.10)        | 0.71 (0.36, 1.39)        |
| High (≥45)                    | 1.23 (0.64, 2.33)                                                       | 0.91 (0.48, 1.71)              | 0.85 (0.51, 1.41)                      | 1.92 (1.14, 3.26)        | 1.67 (0.49, 5.67)        |
| P <sub>interaction</sub>      | 0.83                                                                    | 0.36                           | 0.97                                   | 0.01                     | 0.22                     |

Abbreviations: GAD-7: Generalized Anxiety Disorder scale; HCB: hexachlorobenzene; HOME: Home Observation for Measurement of the Environment; Mn: manganese; Pb: lead;  $\Sigma$ PCB<sub>4</sub>: sum of four polychlorinated biphenyl congeners; PHQ-8: Patient Health Questionnaire;  $p_{\text{interaction}}$ : p-value for interaction term between prenatal chemical biomarker and sociodemographic/non-chemical stressor; p,p'-DDE: dichlorodipenyldichloroethylene; PNSDI: prenatal social disadvantage index

<sup>a</sup> Adjusted for parental and household characteristics (prenatal social disadvantage index, maternal smoking during pregnancy, Home Observation for Measurement of the Environment score) and participant characteristics (sex, race/ethnicity, age at assessment)

<sup>b</sup> For each outcome and chemical, risk ratios were estimated from five models: one with no interaction term and four including a product interaction term between the chemical and each of the four specified other stressors

**Table S16.** Adjusted <sup>a</sup> overall and stratified <sup>b</sup> risk ratios (95% confidence intervals) for moderately elevated anxiety and depressive symptoms, measured via the Generalized Anxiety Disorder scale (GAD-7) and Patient Health Questionnaire (PHQ-8), respectively, associated with a doubling of prenatal and postnatal (i.e., peak early childhood) lead (Pb), among New Bedford Cohort participants

| <b>Internalizing symptoms</b> | <b>Risk ratio (95% confidence interval) per doubling Pb level</b> |                     |
|-------------------------------|-------------------------------------------------------------------|---------------------|
|                               | <b>Prenatal Pb</b>                                                | <b>Postnatal Pb</b> |
| <b>GAD-7 (n=197)</b>          |                                                                   |                     |
| Total                         | 1.55 (1.11, 2.16)                                                 | 1.04 (0.68, 1.60)   |
| Sex-stratified                |                                                                   |                     |
| Female                        | 1.39 (0.96, 2.00)                                                 | 0.99 (0.60, 1.63)   |
| Male                          | 2.16 (1.03, 4.55)                                                 | 1.05 (0.41, 2.67)   |
| P <sub>interaction</sub>      | 0.27                                                              | 0.91                |
| Race/ethnicity-stratified     |                                                                   |                     |
| Underrepresented group        | 1.37 (0.82, 2.29)                                                 | 1.80 (0.91, 3.59)   |
| Non-Hispanic White            | 1.70 (1.26, 2.29)                                                 | 0.70 (0.41, 1.20)   |
| P <sub>interaction</sub>      | 0.46                                                              | 0.03                |
| PNSDI-stratified              |                                                                   |                     |
| High (≥3)                     | 1.40 (0.96, 2.04)                                                 | 0.85 (0.46, 1.59)   |
| Low (<3)                      | 1.98 (1.15, 3.39)                                                 | 1.23 (0.67, 2.28)   |
| P <sub>interaction</sub>      | 0.29                                                              | 0.41                |
| HOME-stratified               |                                                                   |                     |
| Low (<45)                     | 1.43 (0.98, 2.09)                                                 | 1.00 (0.57, 1.75)   |
| High (≥45)                    | 1.98 (1.14, 3.43)                                                 | 1.08 (0.54, 2.13)   |
| P <sub>interaction</sub>      | 0.32                                                              | 0.87                |
| <b>PHQ-8 (n=198)</b>          |                                                                   |                     |
| Total                         | 1.32 (1.00, 1.74)                                                 | 0.78 (0.56, 1.08)   |
| Sex-stratified                |                                                                   |                     |
| Female                        | 1.29 (0.93, 1.77)                                                 | 0.88 (0.60, 1.30)   |
| Male                          | 1.44 (0.77, 2.71)                                                 | 0.60 (0.36, 1.00)   |
| P <sub>interaction</sub>      | 0.75                                                              | 0.24                |
| Race/ethnicity-stratified     |                                                                   |                     |
| Underrepresented group        | 1.11 (0.68, 1.81)                                                 | 0.89 (0.51, 1.55)   |
| Non-Hispanic White            | 1.46 (1.11, 1.93)                                                 | 0.70 (0.48, 1.03)   |
| P <sub>interaction</sub>      | 0.33                                                              | 0.48                |
| PNSDI-stratified              |                                                                   |                     |
| High (≥3)                     | 0.95 (0.64, 1.41)                                                 | 0.76 (0.44, 1.32)   |
| Low (<3)                      | 2.31 (1.52, 3.51)                                                 | 0.72 (0.48, 1.07)   |
| P <sub>interaction</sub>      | 0.002                                                             | 0.86                |
| HOME-stratified               |                                                                   |                     |
| Low (<45)                     | 1.06 (0.74, 1.52)                                                 | 0.86 (0.55, 1.34)   |
| High (≥45)                    | 2.26 (1.46, 3.50)                                                 | 0.62 (0.36, 1.07)   |
| P <sub>interaction</sub>      | 0.01                                                              | 0.36                |

Abbreviations: GAD-7: Generalized Anxiety Disorder scale; HOME: Home Observation for Measurement of the Environment; Pb: leadPHQ-8: Patient Health Questionnaire;  $p_{\text{interaction}}$ : p-value for interaction term between chemical biomarker and sociodemographic/non-chemical stressor; PNSDI: prenatal social disadvantage index

<sup>a</sup> Adjusted for parental and household characteristics (prenatal social disadvantage index, maternal smoking during pregnancy, Home Observation for Measurement of the Environment score) and participant characteristics (sex, race/ethnicity, age at assessment)

<sup>b</sup> For each outcome, risk ratios were estimated from five models: one with both prenatal and postnatal Pb biomarkers and no interaction term, and four including two product interaction terms between (1) cord blood Pb and each of the four specified other stressors and (2) peak early childhood Pb and each of the four specified other stressors

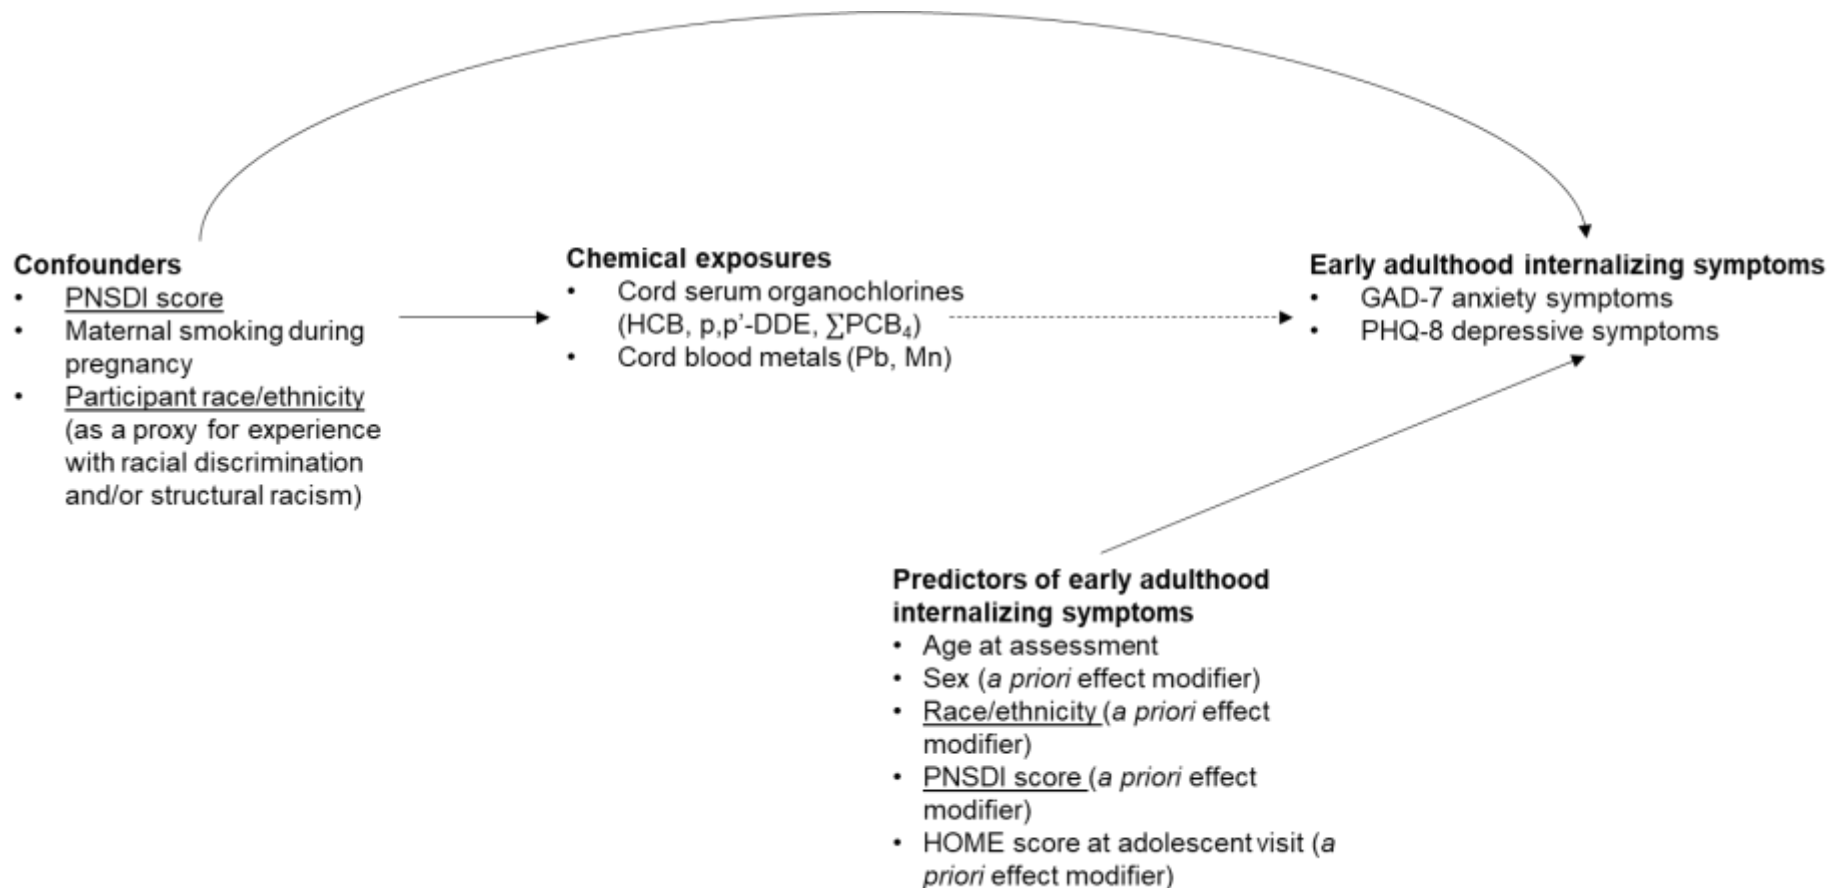

**Figure S1.** Directed acyclic graph identifying confounders, predictors of internalizing symptoms, and effect modifiers for inclusion in regression models. Solid lines indicate *a priori* associations and dashed lines indicate hypothesized associations; underlined text indicates covariates that were considered both confounders and effect modifiers in models. Abbreviations: GAD-7, Generalized Anxiety Disorder scale; HCB, hexachlorobenzene; HOME: Home Observation for Measurement of the Environment; Mn, manganese; Pb, lead;  $\Sigma$ PCB<sub>4</sub>, sum of four polychlorinated biphenyl congeners (congeners: 118, 138, 153, 180); PHQ-8, Patient Health Questionnaire; PNSDI, prenatal social disadvantage index; p,p'-DDE, dichlorodiphenyldichloroethylene.

**A) HCB and GAD-7**

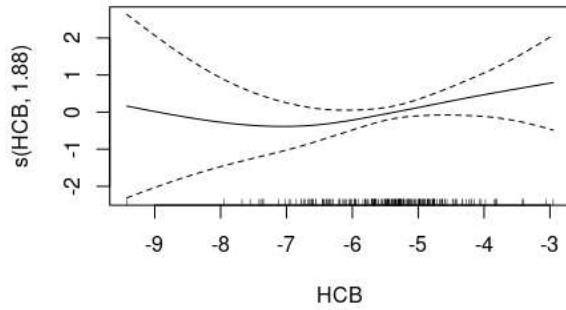

QICu for model with linear term: 210.7  
 QiCu for model with linear and quadratic terms: 211.2

**D) Pb and GAD-7**

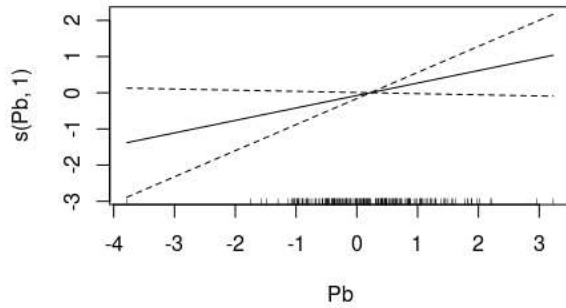

**B) p, p'-DDE and GAD-7**

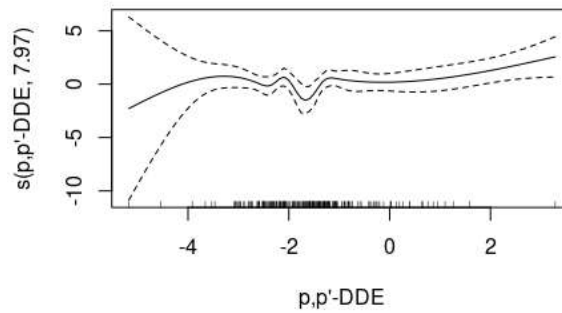

QICu for model with linear term: 211.5  
 QiCu for model with linear and quadratic terms: 210.7

**E) Mn and GAD-7**

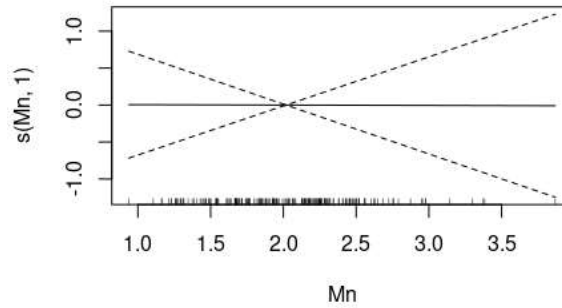

**C) ΣPCB4 and GAD-7**

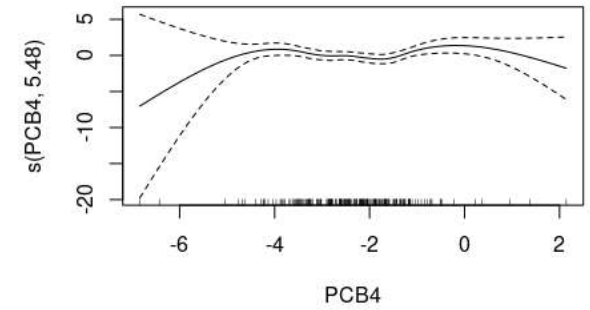

QICu for model with linear term: 212.8  
 QiCu for model with linear and quadratic terms: 214.7

**F) HCB and PHQ-8**

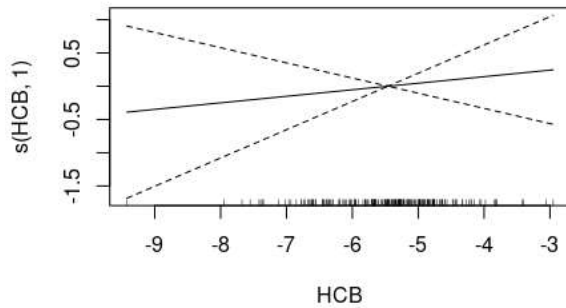

**G) p, p'-DDE and PHQ-8**

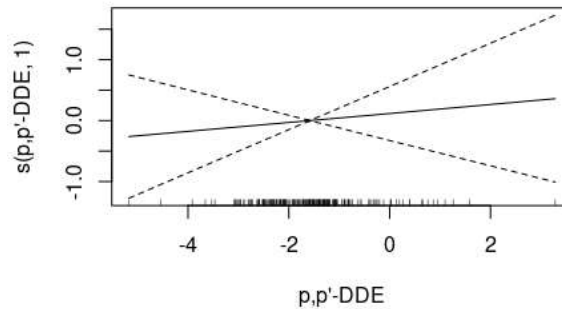

**H) ΣPCB4 and PHQ-8**

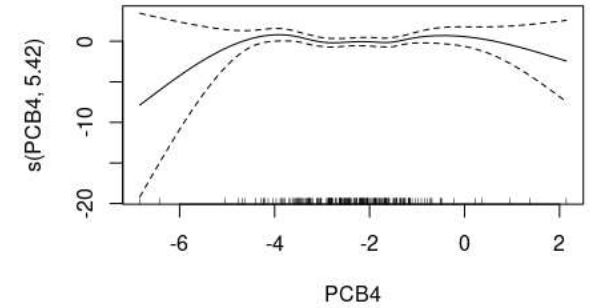

QICu for model with linear term: 239.5  
 QiCu for model with linear and quadratic terms: 241.4

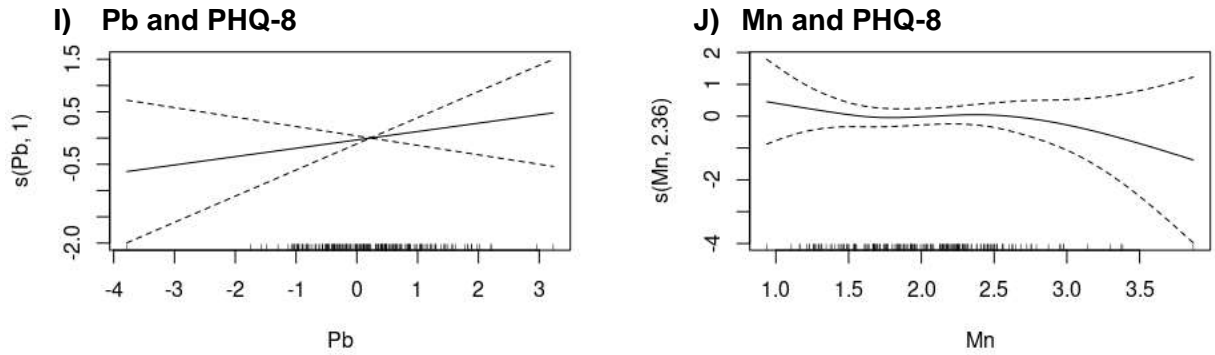

QICu for model with linear term: 228.2  
 QiCu for model with linear and quadratic terms: 229.9

**Figure S2.** Covariate-adjusted associations between the log risk ratio of moderately elevated anxiety and depressive symptoms, measured via the Generalized Anxiety Disorder scale (GAD-7) and Patient Health Questionnaire (PHQ-8), respectively, and chemical biomarkers in single-chemical generalized additive models. Notes: In cases where splines indicated possible quadratic associations, goodness of fit was evaluated with the quasi-likelihood under the independence model information criterion (QICu) to compare modified Poisson regression models including a linear term versus both linear and quadratic terms for exposures; Models were adjusted for parental and household characteristics [prenatal social disadvantage index score (PNSDI), maternal smoking during pregnancy] and participant characteristics [age at assessment, race/ethnicity sex, Home Observation for Measurement of the Environment score]. Abbreviations: GAD-7: Generalized Anxiety Disorder scale; HCB: hexachlorobenzene; Mn: manganese; Pb: lead; PCB4: sum of four polychlorinated biphenyl congeners (congeners: 118, 138, 153, 180); PHQ-8: Patient Health Questionnaire; p,p'-DDE: dichlorodiphenyldichloroethylene.



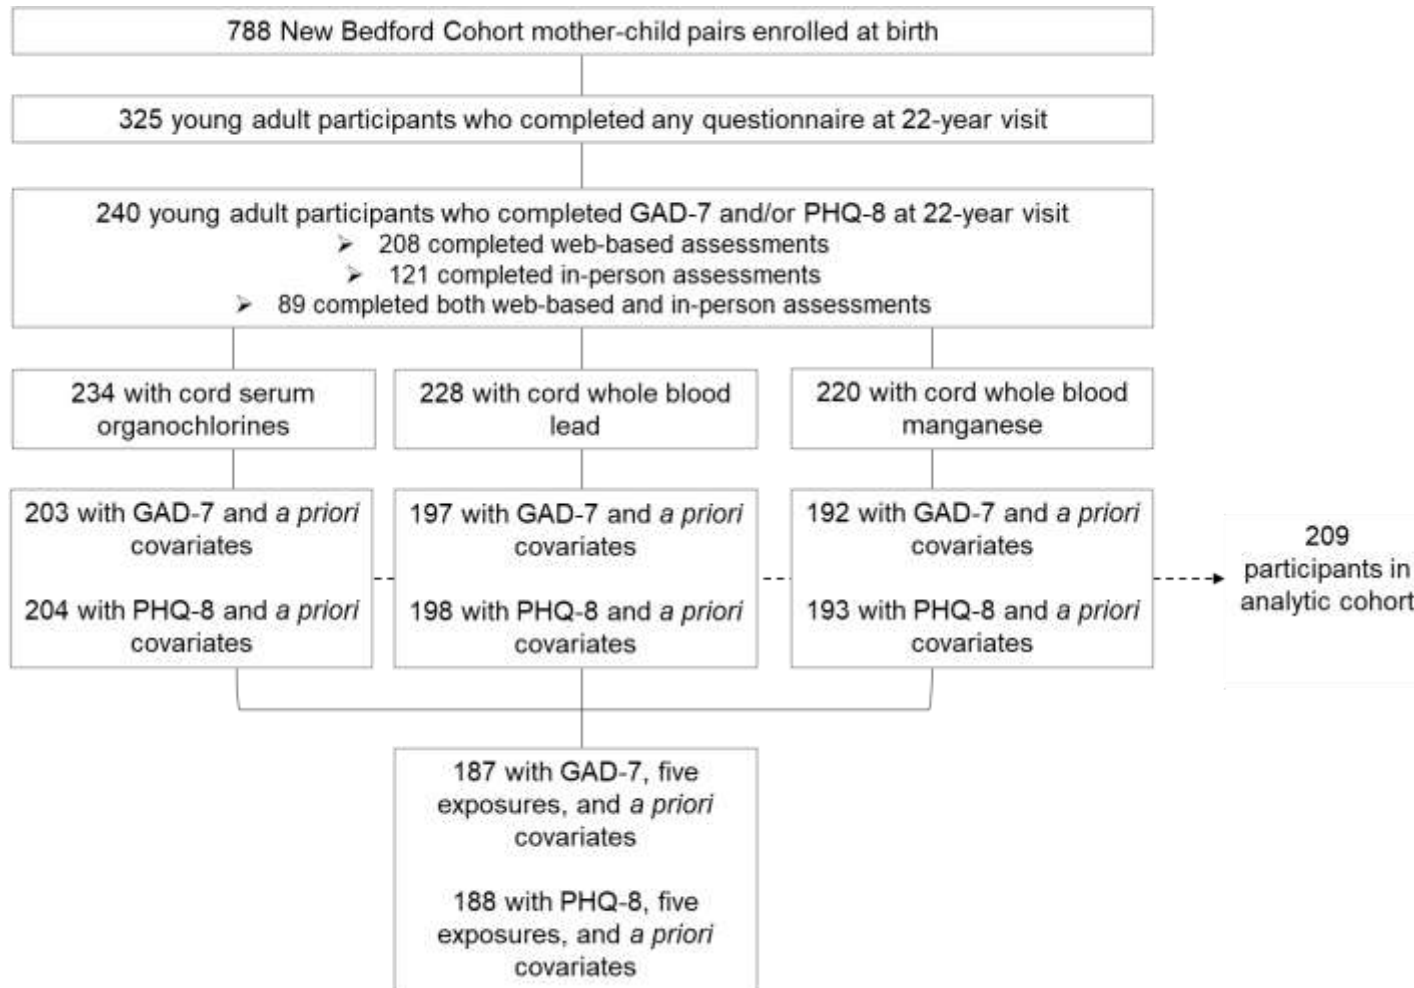

**Figure S3.** Study flow chart for New Bedford Cohort participants included in the analytic cohort. Abbreviations: GAD-7, Generalized Anxiety Disorder Scale; PHQ-8, Patient Health Questionnaire.

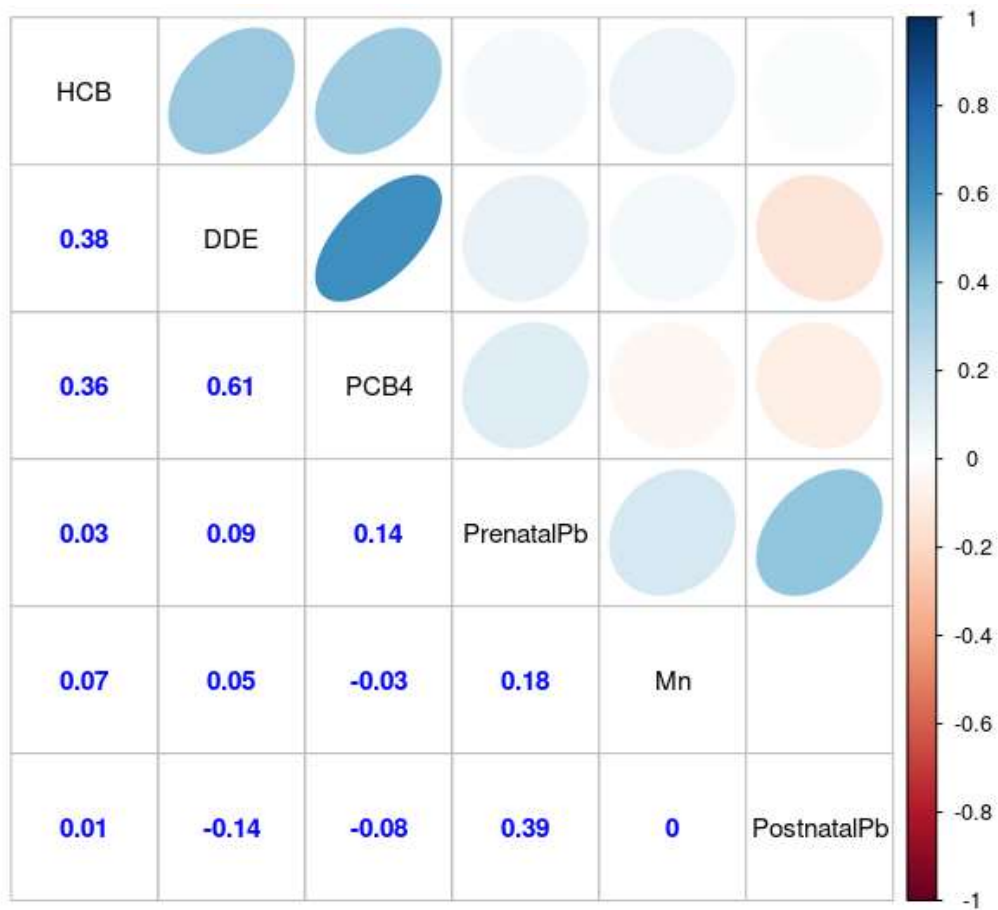

**Figure S4.** Spearman correlations between cord serum biomarkers of organochlorine exposure [i.e., hexachlorobenzene (HCB), dichlorodiphenyldichloroethylene (DDE), sum of four polychlorinated biphenyl congeners (PCB4; congeners: 118, 138, 153, 180)], cord blood biomarkers of metal exposure [lead (PrenatalPb), manganese (Mn)], and peak early childhood blood lead (PostnatalPb) for 209 New Bedford Cohort participants included in at least one complete case analysis.

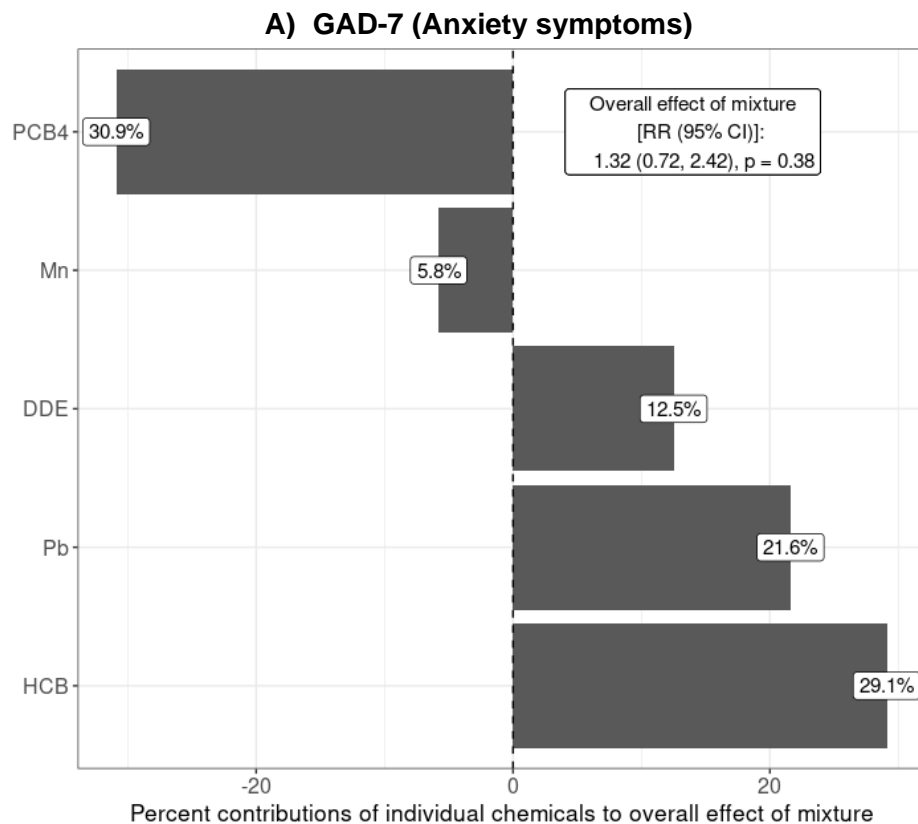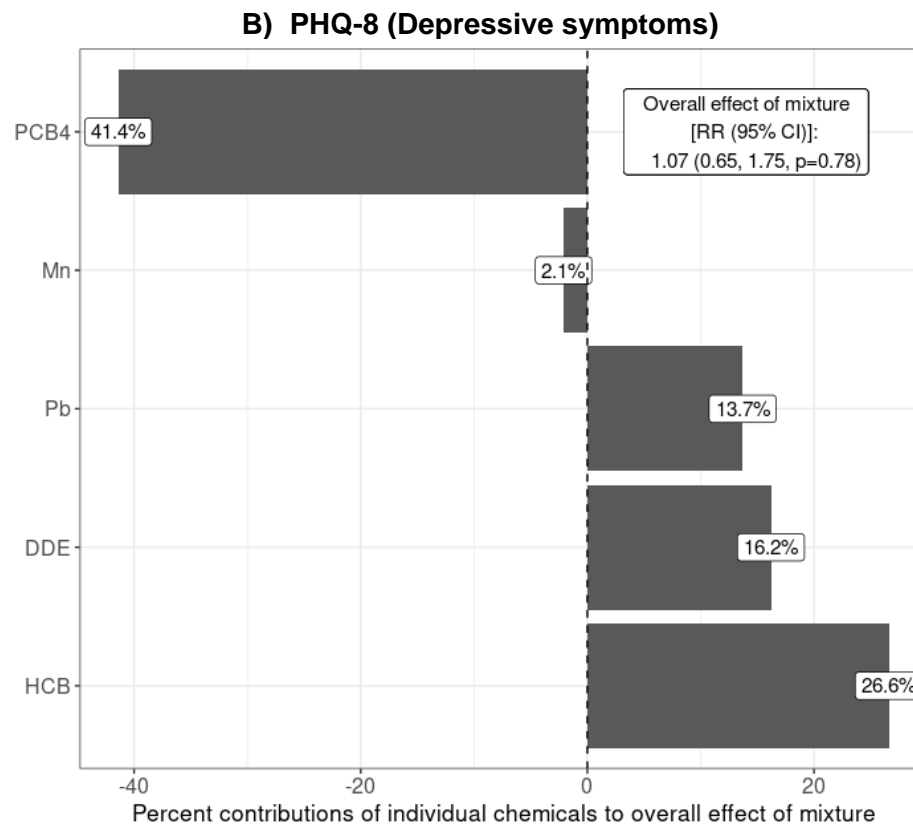

**Figure S5.** Quantile g-computation weights for each chemical in relation to elevated A) Generalized Anxiety Disorder scale (GAD-7) anxiety symptoms and B) Patient Health Questionnaire (PHQ-8) depressive symptoms, in the overall analytic cohort of New Bedford Cohort participants ( $n=187$  for GAD-7,  $n=188$  for PHQ-8). Abbreviations: DDE, dichlorodiphenyldichloroethylene; HCB, hexachlorobenzene; Mn, manganese; Pb, lead; PCB4, sum of four polychlorinated biphenyl congeners (congeners: 118, 138, 153, 180).
