# Supplementary material
Source: PubMed Central journal article supplement (PMC9904409)
Supplement: ehp11171.smcontents.508.pdf [file ehp11171.smcontents.508.pdf]

**Note to readers with disabilities:** *EHP* strives to ensure that all journal content is accessible to all readers. However, some figures and Supplemental Material published in *EHP* articles may not conform to [508 standards](#) due to the complexity of the information being presented. If you need assistance accessing journal content, please contact [ehp508@niehs.nih.gov](mailto:ehp508@niehs.nih.gov). Our staff will work with you to assess and meet your accessibility needs within 3 working days.

### **Supplemental Material**

#### **Associations of Prenatal Chemical and Nonchemical Stressors with Early-Adulthood Anxiety and Depressive Symptoms**

Lisa B. Rokoff, Brent A. Coull, Michelle Bosquet Enlow, and Susan A. Korrick

#### **Table of Contents**

**Table S1.** List of psychotropic medications that New Bedford Cohort young adult participants reported taking on a regular basis on the early adult visit questionnaire.

**Table S2.** Concordance between the race/ethnicity, prenatal social disadvantage index (PNSDI) score, and quality of childhood home environment groups, among 209 New Bedford Cohort young adult participants included in at least one complete case analysis.

**Table S3.** Sociodemographic, exposure, and outcome characteristics of New Bedford Cohort participants who completed the Generalized Anxiety Disorder Scale (GAD-7) and/or Patient Health Questionnaire (PHQ-8) at the early adult visit, and that were included versus excluded in the complete case analytic cohort.

**Table S4.** Overall and strata-specific sample sizes and prevalence of moderately elevated anxiety symptoms [Generalized Anxiety Disorder scale (GAD-7)] and depressive symptoms [Patient Health Questionnaire (PHQ-8)] in complete case single-chemical models.

**Table S5.** Concordance between 1) elevated anxiety symptoms identified on the Generalized Anxiety Disorder scale (GAD-7) and elevated depressive symptoms identified on the Patient Health Questionnaire (PHQ-8); and 2) self-report physician diagnosed (in the past 10 years) anxiety or depression, among young adult New Bedford Cohort participants included in at least one complete case analysis.

**Table S6.** Adjusted overall and stratified risk ratios (95% confidence intervals) for moderately elevated anxiety and depressive symptoms, measured via the Generalized Anxiety Disorder scale (GAD-7) and Patient Health Questionnaire (PHQ-8), respectively, associated with a doubling of chemical in single-exposure models, among New Bedford Cohort participants.

**Table S7.** Unadjusted overall risk ratios (95% confidence intervals) for moderately elevated anxiety and depressive symptoms, measured via the Generalized Anxiety Disorder scale (GAD-7) and Patient Health Questionnaire (PHQ-8), respectively, associated with a doubling of chemical in single-exposure models, among New Bedford Cohort participants.

**Table S8.** Adjusted strata-specific (calculated by running models in stratified datasets) risk ratios (95% confidence intervals) for moderately elevated anxiety and depressive symptoms, measured via the Generalized Anxiety Disorder scale (GAD-7) and Patient Health Questionnaire (PHQ-8), respectively, associated with a doubling of chemical in single-exposure models, among New Bedford Cohort participants.

**Table S9.** Adjusted overall and stratified risk ratios (95% confidence intervals) for self-report physician diagnosed (in the past 10 years) anxiety or depression at the early adult assessment associated with a doubling of chemical in single-exposure models among New Bedford Cohort participants ( $n=161-167$ ).

**Table S10.** Inverse probability of censoring weighted (IPCW) adjusted overall and stratified risk ratios (95% confidence intervals) for moderately elevated anxiety and depressive symptoms, measured via the Generalized Anxiety Disorder scale (GAD-7) and Patient Health Questionnaire (PHQ-8), respectively, associated with a doubling of chemical in single-exposure models, among New Bedford Cohort participants.

**Table S11.** Adjusted overall and stratified risk ratios (95% confidence intervals) for moderately elevated anxiety and depressive symptoms, measured via the Generalized Anxiety Disorder scale (GAD-7) and Patient Health Questionnaire (PHQ-8), respectively, associated with a doubling of hexachlorobenzene (HCB) in single-exposure models among New Bedford Cohort participants, when excluding the minimum outlier HCB value.

**Table S12.** Adjusted overall and stratified risk ratios (95% confidence intervals) for moderately elevated anxiety and depressive symptoms, measured via the Generalized Anxiety Disorder scale (GAD-7) and Patient Health Questionnaire (PHQ-8), respectively, associated with a doubling of chemical in five-exposure models, among New Bedford Cohort participants.

**Table S13.** Adjusted overall and stratified risk ratios (95% confidence intervals) for moderately elevated anxiety and depressive symptoms, measured via the Generalized Anxiety Disorder scale (GAD-7) and Patient Health Questionnaire (PHQ-8), respectively, associated with a doubling of organochlorine exposure in single-exposure models additionally adjusted for prenatal consumption of seafood and local produce, among New Bedford Cohort participants.

**Table S14.** Adjusted overall and stratified risk ratios (95% confidence intervals) for moderately elevated anxiety and depressive symptoms, measured via the Generalized Anxiety Disorder scale (GAD-7) and Patient Health Questionnaire (PHQ-8), respectively, associated with a doubling of chemical in single-exposure models, among New Bedford Cohort participants who had data available on regular medication use at the early adult assessment ( $n=153-161$ ).

**Table S15.** Adjusted overall and stratified risk ratios (95% confidence intervals) for moderately elevated anxiety and depressive symptoms, measured via the Generalized Anxiety Disorder scale (GAD-7) and Patient Health Questionnaire (PHQ-8), respectively, associated with a doubling of chemical in single-exposure models, among New Bedford Cohort participants who had data available on medication use at the early adult assessment and did not report regularly using psychotropic medications ( $n=139-147$ ).

**Table S16.** Adjusted overall and stratified risk ratios (95% confidence intervals) for moderately elevated anxiety and depressive symptoms, measured via the Generalized Anxiety Disorder scale (GAD-7) and Patient Health Questionnaire (PHQ-8), respectively, associated with a doubling of prenatal and postnatal (i.e., peak early childhood) lead (Pb), among New Bedford Cohort participants.

**Figure S1.** Directed acyclic graph identifying confounders, predictors of internalizing symptoms, and effect modifiers for inclusion in regression models. Solid lines indicate *a priori* associations and dashed lines indicate hypothesized associations; underlined text indicates covariates that were considered both confounders and effect modifiers in models. Abbreviations: GAD-7, Generalized Anxiety Disorder scale; HCB, hexachlorobenzene; HOME: Home Observation for Measurement of the Environment; Mn, manganese; Pb, lead;  $\sum$ PCB<sub>4</sub>, sum of four polychlorinated biphenyl congeners (congeners: 118, 138, 153, 180); PHQ-8, Patient Health Questionnaire; PNSDI, prenatal social disadvantage index; p,p'-DDE, dichlorodiphenyldichloroethylene.

**Figure S2.** Covariate-adjusted associations between the log risk ratio of moderately elevated anxiety and depressive symptoms, measured via the Generalized Anxiety Disorder scale (GAD-7) and Patient Health Questionnaire (PHQ-8), respectively, and chemical biomarkers in single-chemical generalized additive models. Notes: In cases where splines indicated possible quadratic associations, goodness of fit was evaluated with the quasi-likelihood under the independence model information criterion (QICu) to compare modified Poisson regression models including a linear term versus both linear and quadratic terms for exposures; Models were adjusted for parental and household characteristics [prenatal social disadvantage index score (PNSDI), maternal smoking during pregnancy] and participant characteristics [age at assessment, race/ethnicity sex, Home Observation for Measurement of the Environment score]. Abbreviations: GAD-7: Generalized Anxiety Disorder scale; HCB: hexachlorobenzene; Mn: manganese; Pb: lead; PCB<sub>4</sub>: sum of four polychlorinated biphenyl congeners (congeners: 118, 138, 153, 180); PHQ-8: Patient Health Questionnaire; p,p'-DDE: dichlorodiphenyldichloroethylene.

**Figure S3.** Study flow chart for New Bedford Cohort participants included in the analytic cohort. Abbreviations: GAD-7, Generalized Anxiety Disorder Scale; PHQ-8, Patient Health Questionnaire.

**Figure S4.** Spearman correlations between cord serum biomarkers of organochlorine exposure [i.e., hexachlorobenzene (HCB), dichlorodiphenyldichloroethylene (DDE), sum of four polychlorinated biphenyl congeners (PCB<sub>4</sub>; congeners: 118, 138, 153, 180)], cord blood biomarkers of metal exposure [lead (PrenatalPb), manganese (Mn)], and peak early childhood blood lead (PostnatalPb) for 209 New Bedford Cohort participants included in at least one complete case analysis.

**Figure S5.** Quantile g-computation weights for each chemical in relation to elevated A) Generalized Anxiety Disorder scale (GAD-7) anxiety symptoms and B) Patient Health Questionnaire (PHQ-8) depressive symptoms, in the overall analytic cohort of New Bedford Cohort participants ( $n=187$  for GAD-7,  $n=188$  for PHQ-8). Abbreviations: DDE, dichlorodiphenyldichloroethylene; HCB, hexachlorobenzene; Mn, manganese; Pb, lead; PCB4, sum of four polychlorinated biphenyl congeners (congeners: 118, 138, 153, 180).
